# Supplementary material
Source: PubMed Central journal article supplement (PMC8116572)
Supplement: mmc2.pdf [file mmc2.pdf]

# METTL3 restrains papillary thyroid cancer progression via m<sup>6</sup>A/c-Rel/IL-8-mediated neutrophil infiltration

Jing He,<sup>1,5</sup> Mingxia Zhou,<sup>2,5</sup> Jie Yin,<sup>3</sup> Junhu Wan,<sup>4</sup> Jie Chu,<sup>4</sup> Jinlin Jia,<sup>4</sup> Jinxiu Sheng,<sup>4</sup> Chang Wang,<sup>4</sup> Huiqing Yin,<sup>4</sup> and Fucheng He<sup>4</sup>

<sup>1</sup>Department of Surgery, The First Affiliated Hospital of Zhengzhou University, Zhengzhou 450052, China; <sup>2</sup>Department of Gastroenterology, The First Affiliated Hospital of Zhengzhou University, Zhengzhou 450052, China; <sup>3</sup>Department of Oncology, The First Affiliated Hospital of Zhengzhou University, Zhengzhou 450052, China; <sup>4</sup>Department of Medical Laboratory, The First Affiliated Hospital of Zhengzhou University, Zhengzhou 450052, China

**Growing evidence indicates that N<sup>6</sup>-methyladenosine (m<sup>6</sup>A) is the most pervasive RNA modification in eukaryotic cells. However, the specific role of METTL3 in papillary thyroid carcinoma (PTC) initiation and development remains elusive. Here we found that downregulation of METTL3 was correlated with malignant progression and poor prognosis in PTC. A variety of gain- and loss-of-function studies clarified the effect of METTL3 on regulation of growth and metastasis of PTC cells *in vitro* and *in vivo*. By combining RNA sequencing (RNA-seq) and methylated RNA immunoprecipitation sequencing (meRIP-seq), our mechanistic studies pinpointed c-Rel and RelA as downstream m<sup>6</sup>A targets of METTL3. Disruption of METTL3 elicited secretion of interleukin-8 (IL-8), and elevated concentrations of IL-8 promoted recruitment of tumor-associated neutrophils (TANs) in chemotaxis assays and mouse models. Administration of the IL-8 antagonist SB225002 substantially retarded tumor growth and abolished TAN accumulation in immunodeficient mice. Our findings revealed that METTL3 played a pivotal tumor-suppressor role in PTC carcinogenesis through c-Rel and RelA inactivation of the nuclear factor  $\kappa$ B (NF- $\kappa$ B) pathway by cooperating with YTHDF2 and altered TAN infiltration to regulate tumor growth, which extends our understanding of the relationship between m<sup>6</sup>A modification and plasticity of the tumor microenvironment.**

## INTRODUCTION

With an estimated 600,000 new cases annually worldwide, thyroid cancer ranks first among endocrine malignancies and is the ninth most common form of cancer in the world.<sup>1</sup> Papillary thyroid carcinoma (PTC) comprises about 90% of all cases of thyroid cancer, which is characterized by an increased tendency of capsular invasion and compression of surrounding organs and a high rate of dissemination to local lymph nodes.<sup>2</sup> At present, the etiology and molecular pathogenesis of PTC remain mostly unclear. B-type RAF kinase, BRAF (V600E) mutation has been reported to be an initiating factor of PTC carcinogenesis.<sup>3</sup> Other potent causes of PTC initiation include v-Ki-ras2 Kirsten rat sarcoma viral oncogene homology gene, KRAS

(S65N) mutation, Ret proto-oncogene (RET)/PTC rearrangement, and paired box 8 (PAX8)/peroxisome proliferation-activated receptor (PPAR) rearrangement.<sup>4</sup> However, many individuals with PTC without these somatic alterations are detected in clinical practice. A better understanding of the molecular mechanisms governing the pathogenesis of PTC is crucial for development of detection biomarkers and therapeutic strategies.

The N<sup>6</sup>-methyladenosine (m<sup>6</sup>A) modification is the most universal RNA modification found on the adenosine base of eukaryotic mRNAs, usually occurring on the RRACH consensus sequence (R = A or G and H = A, C or U) of 3' UTR or stop codon regions.<sup>5</sup> The m<sup>6</sup>A modification is highly reversible because of the tight cooperation of m<sup>6</sup>A “writers,” “erasers,” and “readers.” The m<sup>6</sup>A modification can be installed by m<sup>6</sup>A methyltransferase (a complex consisting of methyltransferase-like 3 [METTL3], methyltransferase-like 14 [METTL14], and WT1 associated protein [WTAP]); removed by m<sup>6</sup>A demethylases (fat mass and obesity-associated protein [FTO] and AlkB homolog 5 RNA demethylase [ALKBH5]); and recognized by the YT521-B homology (YTH) domain family (YTHDF1-3 and YTHDC1-2), insulin-like growth factor 2 mRNA binding proteins (IGF2BP1–IGF2BP3), or eukaryotic initiation factor 3 (EIF3).<sup>6</sup> Accumulating evidence suggests that dysfunctional m<sup>6</sup>A methylation participates in multiple human diseases, including type 2 diabetes, colitis, cardiac hypertrophy, and malignancies.<sup>7–11</sup> Although many studies have established a close relationship between METTL3 expression and malignant phenotypes of different cancers, the potential role of METTL3 in PTC is largely elusive.

Here we carried out a series of *in vivo* and *in vitro* experiments to systematically delineate the biological functions of METTL3 and its

Received 9 August 2020; accepted 12 January 2021;  
<https://doi.org/10.1016/j.ymthe.2021.01.019>.

<sup>5</sup>These authors contributed equally

**Correspondence:** Fucheng He, Department of Medical Laboratory, The First Affiliated Hospital of Zhengzhou University, Zhengzhou 450052, Henan, China.  
**E-mail:** [hefucheng@zzu.edu.cn](mailto:hefucheng@zzu.edu.cn)

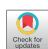

underlying molecular mechanisms in human PTC carcinogenesis. We uncovered that the tumor-suppressing effect of METTL3 could be attributed to c-Rel- and RelA-mediated inactivation of the nuclear factor  $\kappa$ B (NF- $\kappa$ B) pathway. Silencing of METTL3 increased secretion of interleukin-8 (IL-8) from PTC cells, driving chemotaxis of tumor-associated neutrophils (TANs) to organize the immunosuppressive tumor microenvironment to support PTC progression. Our findings provide novel insights into the molecular mechanism of PTC carcinogenesis epigenetic alterations and indicate that METTL3 and its related c-Rel/IL-8 axis could be pivotal targets for treatment of PTC.

## RESULTS

### Decreased expression of METTL3 correlates with a poor prognosis of individuals with PTC

To identify the roles of the m<sup>6</sup>A modification in progression of PTC, we first examined m<sup>6</sup>A writer (METTL3, METTL14, and WTAP) and m<sup>6</sup>A eraser (FTO and ALKBH5) expression in 60 pairs of PTC and adjacent normal thyroid tissue in our cohort. RT-PCR results showed that METTL3 and METTL14 were reduced in tumor tissue related to non-tumor samples, whereas WTAP, FTO, and ALKBH5 levels showed no pronounced differences between tumor and normal specimens (Figure 1A). We also screened the expression profiles of these m<sup>6</sup>A-related genes in the GEPIA platform, and the pattern of METTL3 expression was consistent with our RT-PCR data (Figure S1A). Because METTL3 exhibited the most distinct differential expression, we chose METTL3 for further analysis. Next we detected the protein level of METTL3 in PTC tissue. Western blot revealed that METTL3 was more abundantly expressed in human thyroid tissue (Figure 1B). Immunohistochemistry results from 58 PTC specimens corroborated these findings; immunohistochemistry (IHC) scores confirmed that METTL3 was silenced in human PTC tissue (Figures 1C and 1D). METTL3 was downregulated in a panel of PTC cell lines compared with the normal thyroid follicular cell line Nthy-ori 3-1 at the mRNA and protein levels (Figures 1E and 1F). Immunofluorescence staining showed that METTL3 was mainly localized in the cell nucleus and expressed weakly in tumor cells (Figure 1G). Furthermore, individuals with PTC with low expression of METTL3 had a worse prognosis, and METTL3 expression was inversely correlated with poor recurrence-free survival (RFS) (Figure S1B). We also noticed that higher METTL14 expression was tightly correlated with shorter overall survival (Figure S1C).

### METTL3 deficiency accelerates PTC cell proliferation

We proceeded to dissect the global m<sup>6</sup>A level in PTC tissue and cell lines using an m<sup>6</sup>A RNA methylation quantification kit. The m<sup>6</sup>A RNA levels were remarkably higher in normal thyroid tissues compared with matched tumor tissues and in thyroid follicular cells in comparison with PTC cells (Figure 2A). To clarify the putative role of METTL3 in PTC tumorigenesis, we constructed vectors stably expressing wild-type METTL3 and catalytic mutant (amino acids [aa] 395–398, DPPW–APPA) METTL3 using the pCDH plasmid in KTC-1 cells with the lowest endogenous level of METTL3. Additionally, two specific short hairpin RNAs (shRNAs) targeting METTL3 were transfected into BCPAP and TPC-1 cells. The knockdown and

overexpression efficiency was determined by RT-PCR and western blot in these PTC cell lines (Figures 2B and 2C; Figure S2A). We examined the change in m<sup>6</sup>A RNA levels upon METTL3 overexpression or inhibition in PTC cells. As anticipated, knockdown of METTL3 prominently decreased the m<sup>6</sup>A level in PTC cells (Figure 2D). In contrast, METTL3 overexpression elevated the level of m<sup>6</sup>A modification, whereas the catalytic mutant METTL3 abolished this (Figure S2B). EdU incorporation assays were conducted to find out the effects of METTL3 on cell proliferation. These results implied that silencing of METTL3 considerably accelerated the growth of BCPAP and TPC-1 cells (Figure 2E). PTC cell viability was measured by Cell Counting Kit-8 (CCK-8) and CellTiter-Glo assay. Deficiency in METTL3 resulted in enhanced cell viability, whereas ectopic expression of METTL3 evoked opposite effects (Figures 2F and 2G; Figures S2C and S2D). Strikingly, the m<sup>6</sup>A catalytic activity of METTL3 was indispensable for regulating the growth of PTC cells because mutant METTL3 could not decelerate cell proliferation. Moreover, a robust decrease in colony numbers was observed in METTL3-overexpressing KTC-1 cells, as evidenced by colony formation assays (Figure S2E). On the contrary, METTL3 knockdown promoted the colony formation ability in BCPAP and TPC-1 cells (Figure 2H). These results illustrate the anti-proliferative role of METTL3 in PTC cells.

### Loss of METTL3 triggers PTC cell metastasis

Cancer metastasis is the leading cause of death in individuals with PTC. Gain- and loss-of-function studies were utilized to assess the effects of METTL3 on PTC cell mobility. Boyden chamber assays demonstrated that depletion of METTL3 induced, but overexpression of METTL3 weakened, PTC cell migration and invasion *in vitro* (Figures 3A and 3B; Figures S3A and S3B). These results were further substantiated by *in vivo* experimental lung metastasis models. The same amounts of METTL3-deficient and control BCPAP cells were injected into immunocompromised nude mice through the tail vein. Ablation of METTL3 efficiently augmented the number of metastatic lung nodules in nude mice after 8 weeks of injection (Figures 3C and 3D). The opposite was observed in wild-type and mutant METTL3 overexpression and corresponding control KTC-1 cells. Exogenous expression of METTL3 suppressed tumor cells seeding, as detected by H&E staining of lung sections of these mice (Figures S3C and S3D). In conclusion, METTL3 has inhibitive effects on PTC metastasis with dependence on its m<sup>6</sup>A catalytic activity.

### Transcriptome-wide RNA-seq and m<sup>6</sup>A-seq identify c-Rel as m<sup>6</sup>A-mediated targets

To better understand the possible mechanism of METTL3 participation in PTC progression, we first performed RNA sequencing (RNA-seq) analysis using METTL3-silenced BCPAP and TPC-1 and their control cells. We identified 486 and 1,119 differentially expressed genes in BCPAP and TPC-1 cells, respectively (Figures S4A and S4B). Among them, 52 genes were coherently altered by METTL3 knockdown in both BCPAP and TPC-1 cells. Gene Ontology (GO) and KEGG enrichment analysis revealed that these genes were mostly linked to cytokine receptor binding, the NF- $\kappa$ B signaling pathway,

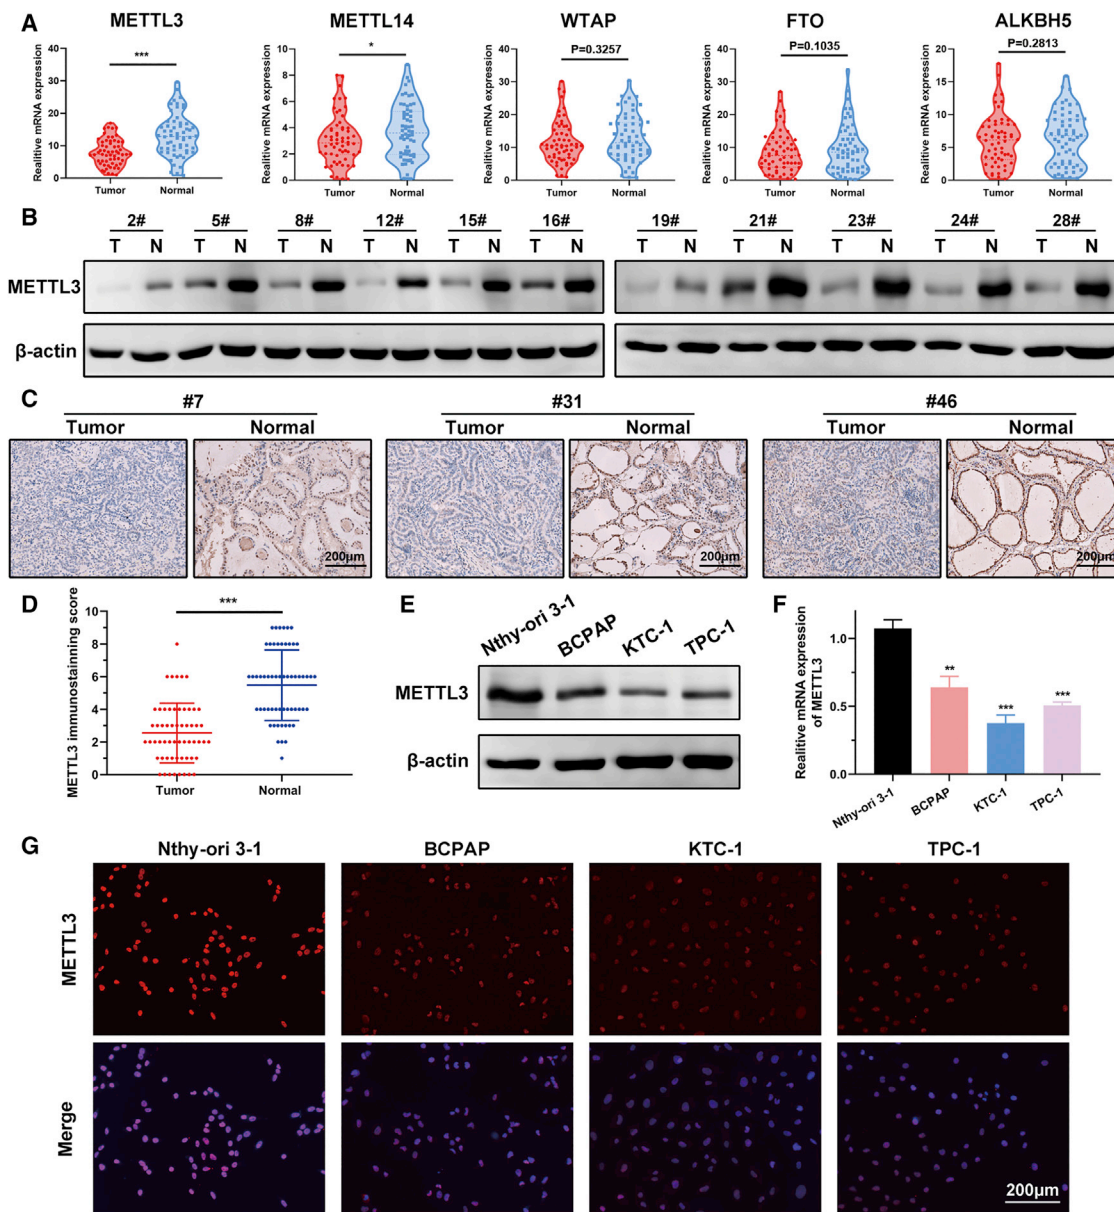

**Figure 1. METTL3 is silenced in human PTC samples and cell lines**

(A) Violin plots showing METTL3, METTL14, WTAP, FTO, and ALKBH5 expression on the basis of the 60 human PTC tissues and paired normal thyroid tissues. (B) Western blot analysis of METTL3 protein expression in 11 paired human PTC samples and non-tumor thyroid tissues.  $\beta$ -Actin was served as the loading control. (C) Representative IHC staining of METTL3 in thyroid tissue sections from individuals with PTC. Magnification, 200 $\times$ . Scale bar, 200  $\mu$ m. (D) Quantification of IHC staining for METTL3 in 58 primary human PTC samples and matched normal tissues. The score was assessed on a scale of 0–3 in staining areas and densities. (E and F) Western blot and RT-PCR analysis showing that METTL3 expression was decreased in PTC cells. (G) Representative images of immunofluorescence staining, showing expression of METTL3 in thyroid follicular epithelial cells and PTC cells. Magnification, 200 $\times$ . Scale bar, 200  $\mu$ m. Data represent the mean  $\pm$  SD (\* $p$  < 0.05, \*\*\* $p$  < 0.001).

and transcriptional misregulation in cancer, supporting a regulatory role of METTL3 in carcinogenesis of PTC (Figures S4C and S4D). Next we performed m<sup>6</sup>A-seq in METTL3-deficient BCPAP cells to detect METTL3-mediated m<sup>6</sup>A methylated transcripts. A total of 472 and 832 up- and downregulated m<sup>6</sup>A peaks were defined globally from m<sup>6</sup>A-seq libraries. m<sup>6</sup>A signals were specifically abundant in the

3' UTR, and the consensus motif GAAC was highly enriched in the control and METTL3 knockdown groups (Figures S5A and S5B; Figure 4A). Considering that METTL3 is responsible for catalyzing the m<sup>6</sup>A modification, we mainly focused on the downregulated m<sup>6</sup>A peaks caused by METTL3 silencing in PTC cells. These m<sup>6</sup>A-modified transcripts exhibited apparent associations with the NF- $\kappa$ B



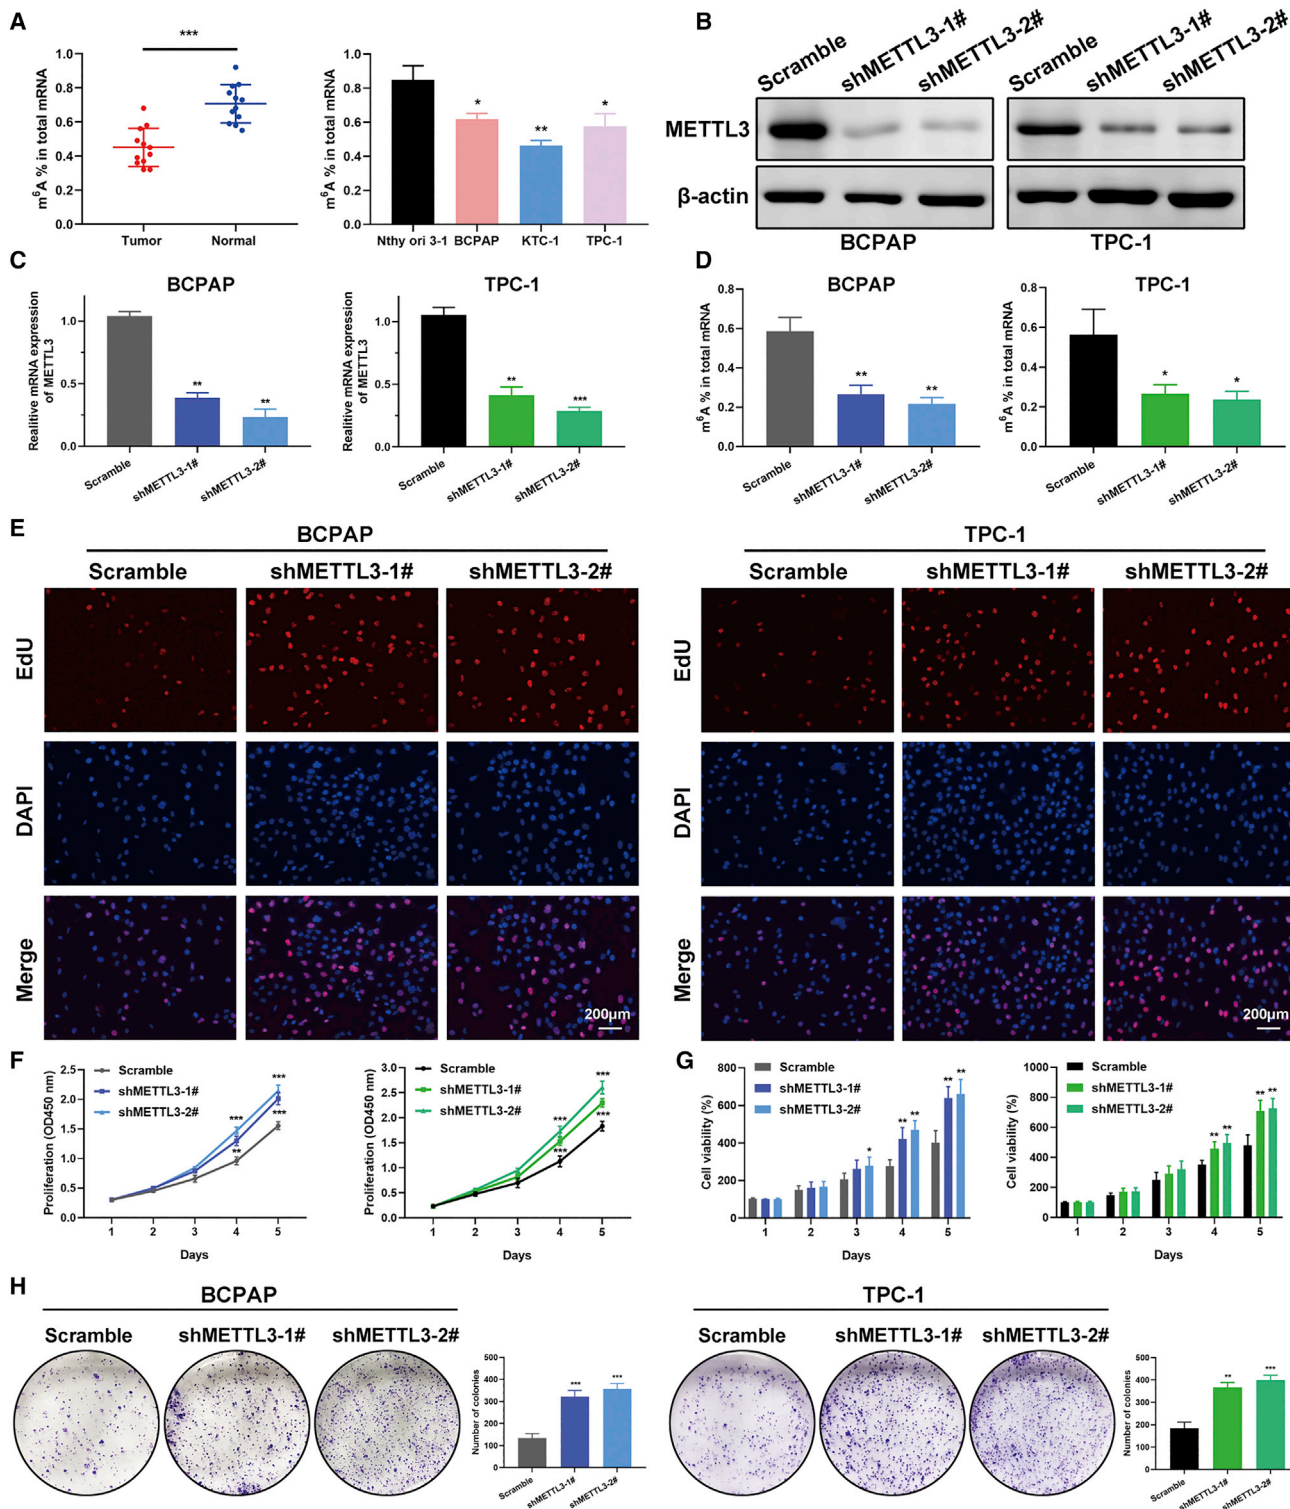

**Figure 2. Silencing of METTL3 decreases m<sup>6</sup>A levels and promoted growth of PTC cells**

(A) Decreased m<sup>6</sup>A mRNA methylation levels were confirmed in PTC tumor tissues and PTC cell lines by m<sup>6</sup>A colorimetry analysis. n = 12 for paired PTC and normal tissues.

(B) BCPAP and TPC-1 cells were transfected with different shMETTL3 vectors and a scramble vector (negative control), and the knockdown effect was verified by western

(legend continued on next page)



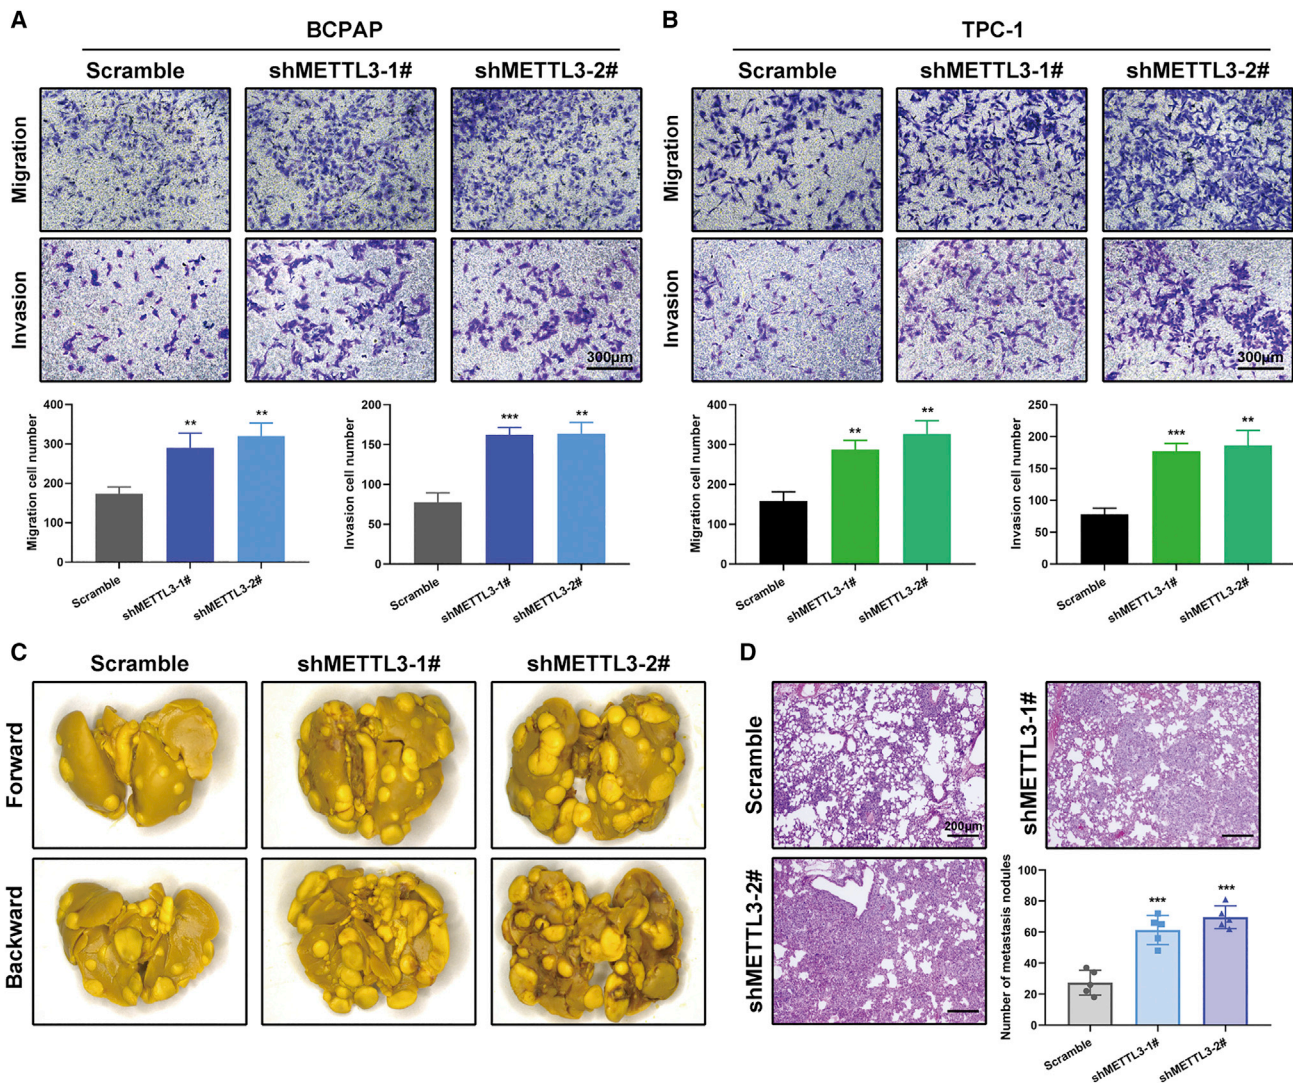

**Figure 3. Inhibition of METTL3 drives PTC cell metastasis *in vitro* and *in vivo***

(A and B) Transwell migration assays and Matrigel invasion assays were used to determine the cell migration and invasion capabilities of BCPAP and TPC-1 cells transfected with the shMETTL3 and control vectors. Shown is quantification of cell numbers from three independent experiments. Magnification, 200 $\times$ . Scale bar, 300  $\mu$ m. (C) Representative images of lung metastasis lesions derived from nude mice 8 weeks after injection of control and METTL3 knockdown BCPAP cells (n = 5 mice per group). (D) H&E staining and quantification of metastatic nodules in the lungs of the indicated groups of nude mice. Magnification, 50 $\times$ . Scale bar, 200  $\mu$ m. Data represent the mean  $\pm$  SD (\*\*p < 0.01, \*\*\*p < 0.001).

signaling pathway, RNA degradation, and cellular nitrogen compound metabolic process (Figures S5C and S6D). Combining the hypomethylated m<sup>6</sup>A peaks from m<sup>6</sup>A-seq with differentially expressed genes from RNA-seq, 19 genes were filtered (Figure 4B). Among these overlapping genes, c-Rel has been recognized as an important transcription factor in the NF- $\kappa$ B family. From our m<sup>6</sup>A-seq data, we

confirmed that m<sup>6</sup>A abundance in the c-Rel mRNA was diminished in response to METTL3 knockdown (Figure 4C). We also found that another NF- $\kappa$ B subunit, RelA/p65, showed decreased m<sup>6</sup>A methylation in METTL3 knockdown cells with respect to control cells. Hence, these two genes were chosen as candidate targets of METTL3 for subsequent research. Methylated RNA

blot. (C and D) Two shRNAs targeting METTL3 decreased METTL3 mRNA expression and endogenous m<sup>6</sup>A levels in BCPAP and TPC-1 cells. (E) The effect of METTL3 on proliferation of BCPAP and TPC-1 cells was determined by EdU assays. Magnification, 200 $\times$ . Scale bar, 200  $\mu$ m. (F) Knockdown of METTL3 enhanced cell viability in both cell lines, as shown by CCK-8 assays. (G) Knockdown of METTL3 accelerated PTC cell proliferation, as evidenced by CellTiter-Glo luminescence assays. (H) The number of colonies increased dramatically after knockdown of METTL3 in the BCPAP and TPC-1 cell lines. Data are expressed as mean  $\pm$  SD (\*p < 0.05, \*\*p < 0.01, \*\*\*p < 0.001).

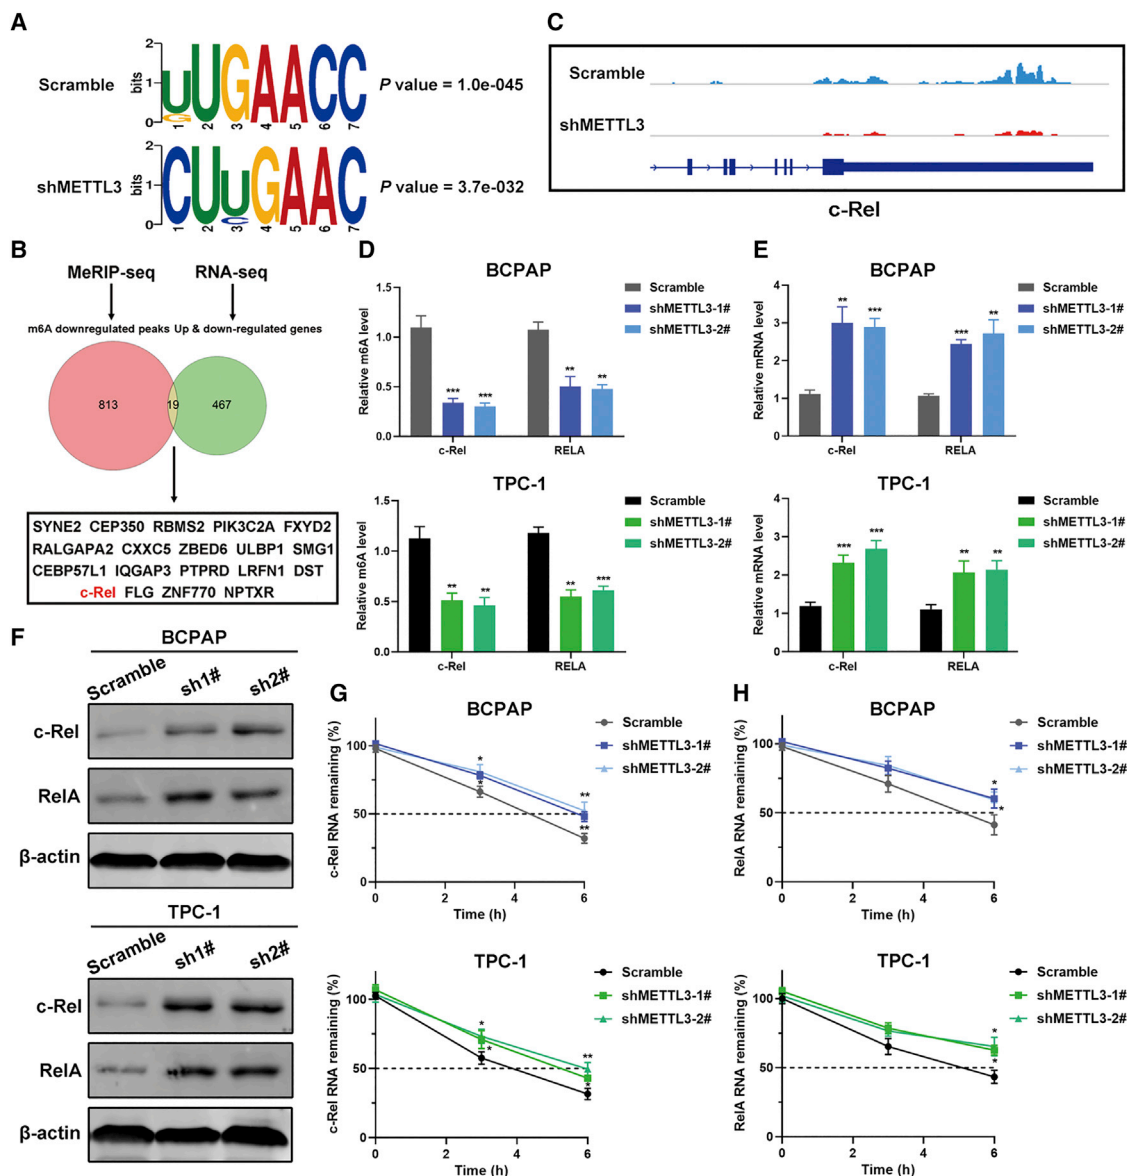

**Figure 4. Identification of potential targets of METTL3-mediated m<sup>6</sup>A modification in PTC cells**

(A) The predominant consensus motif GAAC was identified in m<sup>6</sup>A-seq results from control and shMETTL3 cells. (B) Venn diagram demonstrating that 19 genes overlap in differentially expressed genes by RNA-seq and downregulated peaks by m<sup>6</sup>A-seq. (C) m<sup>6</sup>A-seq identification of m<sup>6</sup>A modification sites in c-Rel mRNA. (D) meRIP-qPCR analysis of c-Rel and RelA RNA m<sup>6</sup>A levels in BCPAP (top panel) and TPC-1 (bottom panel) cells with METTL3 knockdown. (E) RT-PCR analysis of alterations of the mRNA levels of c-Rel and RelA in METTL3 knockdown and control PTC cells. (F) Western blot of c-Rel and RelA protein expression upon knockdown of METTL3 in PTC cells. (G and H) The mRNA half-life of c-Rel (G) and RelA (H) was evaluated in METTL3 knockdown cells and their corresponding control PTC cells treated with actinomycin D (5  $\mu$ g/mL) at the indicated time point by RT-PCR. Data represent the mean  $\pm$  SD (\* $p$  < 0.05, \*\* $p$  < 0.01, \*\*\* $p$  < 0.001).

immunoprecipitation (meRIP)-qPCR using an m<sup>6</sup>A-specific antibody detected that the m<sup>6</sup>A levels of c-Rel and RelA were decreased in METTL3-silenced BCPAP and TPC-1 cells and increased in METTL3-overexpressing KTC-1 cells. However, mutant METTL3 lost the ability to regulate the levels of m<sup>6</sup>A modification of c-Rel and RelA (Figure S6A). Additionally, inhibition of METTL3 contributed to the increased mRNA levels of c-Rel and RelA and overex-

pression of METTL3 showed the opposite trends, as evidenced by RT-PCR (Figures 4D and 4E; Figure S6B). Corroborating the transcriptional levels, immunoblotting confirmed the negative regulation of METTL3 on the protein levels of c-Rel and RelA (Figure 4F; Figure S6C). We then surmised that the m<sup>6</sup>A modification might affect the stability of the c-Rel and RelA mRNAs. To test this, PTC cells were incubated with the transcription inhibitor actinomycin D for 3 h and

6 h. RT-PCR data showed that METTL3 knockdown prolonged the lifetime of the c-Rel and RelA mRNAs and that forced expression of METTL3 shortened the half-life of c-Rel and RelA in KTC-1 cells (Figures 4G and 4H; Figure S6D). We also treated PTC cells with the global methylation inhibitor 3-deazaadenosine (DAA) to block global m<sup>6</sup>A activity. We found that DAA treatment stimulated the mRNA levels of c-Rel and RelA in KTC-1 cells stably overexpressing wild-type or mutant METTL3, implying that c-Rel and RelA were modulated by m<sup>6</sup>A methylation (Figure S6E). Finally, we analyzed the activity of the NF-κB pathway using the pNF-κB-Luc reporter. As expected, ablation of METTL3 led to activation of the NF-κB pathway, whereas catalytic mutant METTL3 abrogated the ability to induce the NF-κB pathway (Figures S6F and S6G). Additionally, c-Rel and RelA deletion in BCPAP or TPC-1 cells prominently weakened NF-κB pathway activity. These results proved the importance of c-Rel and RelA in METTL3-mediated NF-κB signaling (Figure S7A). Collectively, these data establish that METTL3 regulates c-Rel and RelA mRNA homeostasis via m<sup>6</sup>A methyltransferase activity.

#### METTL3 regulates c-Rel in an m<sup>6</sup>A-YTHDF2-dependent manner

To further ascertain the role of METTL3 in controlling m<sup>6</sup>A modification of c-Rel, we introduced three synonymous mutations at the putative m<sup>6</sup>A sites in c-Rel, predicted by SRAMP (<http://www.cuilab.cn/sramp>).<sup>12</sup> The c-Rel 3' UTR containing different point mutations (adenine was replaced with thymine to eradicate the m<sup>6</sup>A modification) was cloned into the pmirGlo dual-luciferase reporter, and the luciferase activity of the wild-type or mutant c-Rel-fused reporter was measured in control and METTL3 knockdown BCPAP and TPC-1 cells. A 2- to 3-fold increase in luciferase activity was observed in the wild-type 3' UTR of c-Rel in BCPAP and TPC-1 cells lacking METTL3. Mut2 and mut3 lost METTL3-mediated activation of c-Rel luciferase activity in BCPAP cells (Figure 5A). However, only mut3 abrogated this induction by suppression of METTL3 in TPC-1 cells, suggesting that the AGTCT sequence (mut3) in the 3' UTR of c-Rel is essential for METTL3-mediated m<sup>6</sup>A modulation. Because c-Rel was negatively regulated by m<sup>6</sup>A methylation, we presumed that YTHDF2, the m<sup>6</sup>A reader protein that facilitates decay of m<sup>6</sup>A methylated transcripts, may participate in m<sup>6</sup>A methylation of c-Rel mRNA. Moreover, we screened previous published RIP sequencing (RIP-seq) data (GSE49339) and discovered direct binding between the c-Rel transcript and YTHDF2 in HeLa cells. To validate our hypothesis, small interfering RNA (siRNA) targeting YTHDF2 was integrated into PTC cells with the indicated vectors. We noticed that inhibition of YTHDF2 indeed stimulated c-Rel mRNA expression to different degrees in BCPAP and TPC-1 cells, whereas inhibition of METTL3 impaired regulation of YTHDF2 for stabilizing c-Rel mRNA (Figure 5B). RIP-qPCR was performed using anti-YTHDF2 to confirm the interaction between c-Rel mRNA and YTHDF2 in all three PTC cell lines. Notably, YTHDF2 could also bind to the mRNA of RelA in PTC cells (Figure 5C). Given that YTHDF2 promotes mRNA degradation by selectively binding m<sup>6</sup>A-modified mRNA, we quantified the mRNA stability of c-Rel and RelA upon knockdown of YTHDF2. YTHDF2 downregulation

postponed the decay of m<sup>6</sup>A-methylated transcripts in YTHDF2-depleted BCPAP and TPC-1 cells (Figures 5D and 5F). Deletion of YTHDF2 partly prolonged the lifespan of c-Rel and RelA mRNA in METTL3-overexpressing KTC-1 cells (Figures 5E and 5G). To further unveil whether the tumor-restraining effects of METTL3 were dependent on YTHDF2, we examined cell proliferation and metastasis by CCK-8 and Transwell assays. These results showed that the anti-tumor phenotypes initiated by METTL3 overexpression were restored by inhibition of YTHDF2 in KTC-1 cells (Figures 5H and 5I). In summary, YTHDF2 recognizes the m<sup>6</sup>A modification of c-Rel and RelA and assist METTL3 to participate in PTC progression.

#### Inhibition of c-Rel retards malignant progression of PTC

c-Rel, which is encoded by the REL gene in humans, plays a crucial role in regulation of inflammation and apoptosis.<sup>13</sup> Evidence has highlighted a strong link between c-Rel and multiple malignancies. However, the precise role of c-Rel in PTC tumorigenesis has not been documented. Therefore, we first determined the effect of c-Rel expression on PTC tumor metastasis *in vitro* and *in vivo*. We observed that the increased metastatic potential associated with METTL3 deficiency could be partially attenuated by depletion of c-Rel, as evidenced by Transwell migration and invasion experiments (Figures 6A and 6B; Figure S7B). In line with the *in vitro* findings, knockdown of c-Rel appreciably influenced lung metastasis colonization in tail vein injection models (Figure 6C). H&E staining substantiated the reduced lung metastatic burden in the double knockdown METTL3 and c-Rel group versus METTL3-deficient BCPAP cells (Figure 6D). Furthermore, genetic ablation of c-Rel also impaired the effects of METTL3 inhibition on cell growth, as assessed by EdU immunofluorescence assays (Figures 6E and 6F). Similar results were observed in CCK-8 and CellTiter-Glo experiments. Depletion of endogenous c-Rel in METTL3 knockdown BCPAP and TPC-1 cells mitigated the effects of METTL3-induced enhanced cell viability (Figures 6G and 6H). Moreover, we also assessed the potential effects of RelA in METTL3-deficient PTC cells. The data showed that RelA depletion resulted in attenuation of increased proliferation and migration induced by METTL3 silencing, highlighting the essential role of RelA in METTL3-controlled malignant behavior (Figures S7C and S7D). Subsequently, we tested the roles of METTL3 and c-Rel in tumorigenicity using tumor xenograft models. We generated xenografts on a background of BCPAP cells transfected with a control vector, METTL3-knockdown vector, and METTL3 plus c-Rel knockdown vector in BALB/c mice. The average tumor weights and volumes were persistently increased in mouse xenografts injected with BCPAP cells bearing shMETTL3 vectors, whereas inhibition of c-Rel in the METTL3 deletion group caused reduced tumor growth compared with the shMETTL3 groups (Figures 7A–7C). IHC staining of tumor samples showed a dramatic increase in c-Rel and RelA levels upon METTL3 knockdown (Figure 7D). Conversely, KTC-1 cells bearing stable METTL3 expression showed restrained tumor growth compared with control KTC-1 cells and mutant METTL3 groups (Figures 7E–7G). Primary tumor sections from



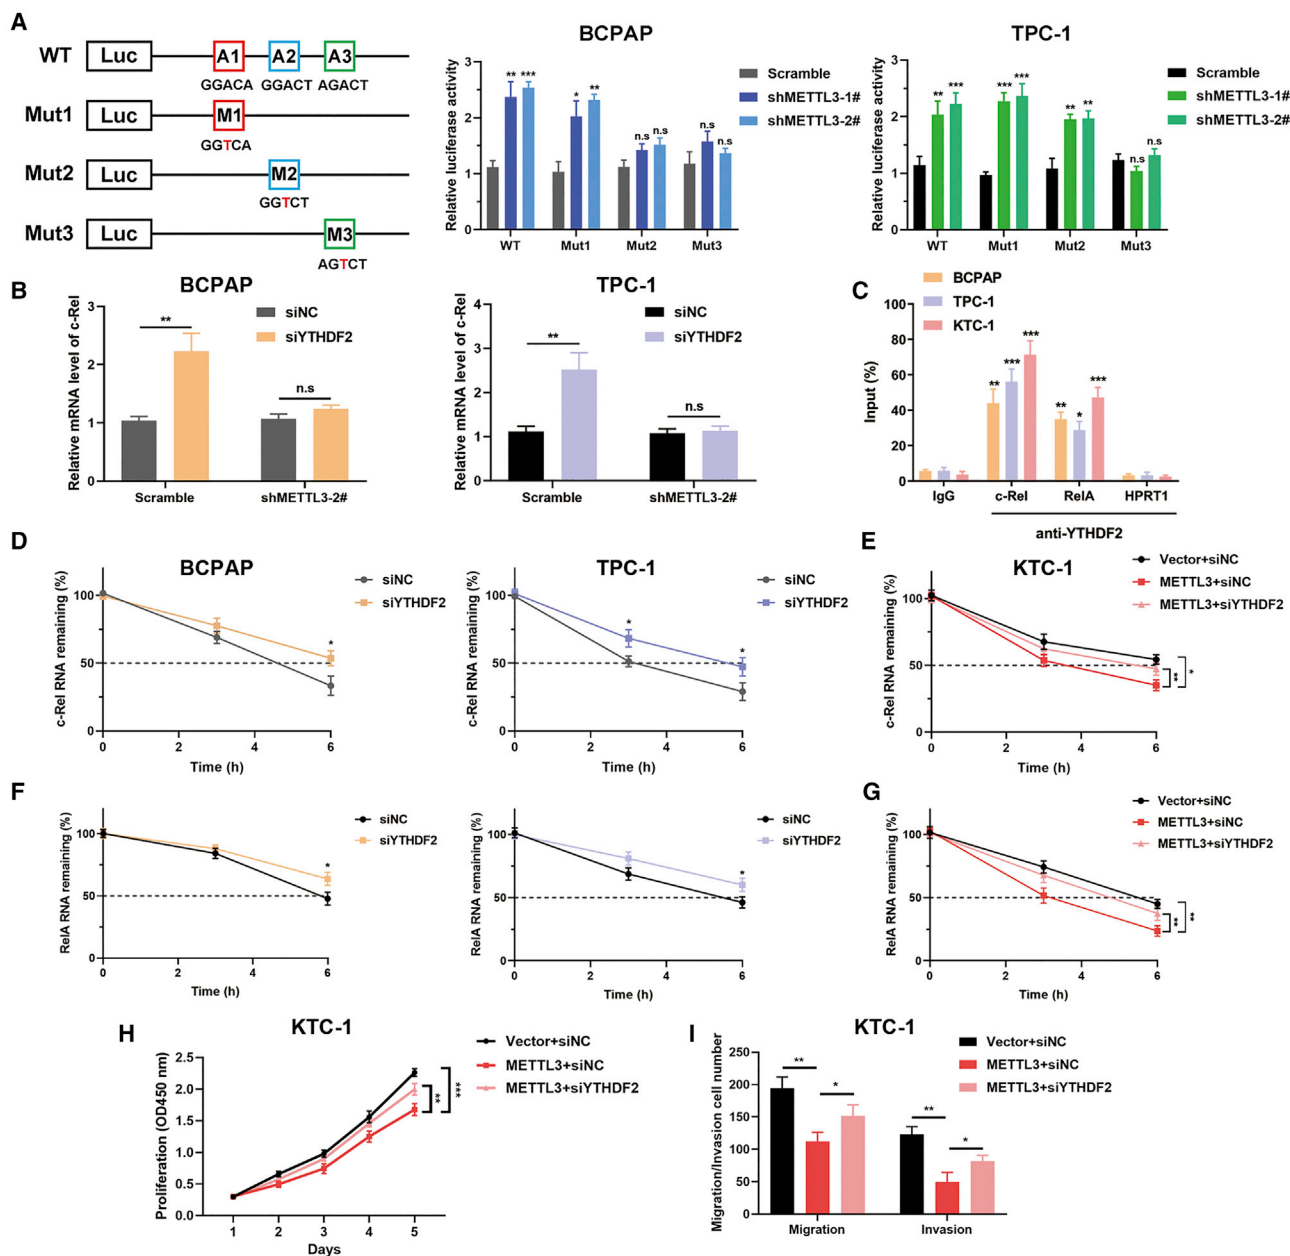

**Figure 5. METTL3 regulates m<sup>6</sup>A modification of c-Rel in a YTHDF2-dependent manner**

(A) Putative m<sup>6</sup>A modification sites in the sequences of c-Rel 3' UTR mRNA transcripts. Shown is the relative luciferase activity of the c-Rel 3' UTR luciferase reporter with wild-type or synonymous mutant m<sup>6</sup>A sites in scramble and shMETTL3 BCPAP (center panel) and TPC-1 (right panel) cells. (B) The mRNA level of c-Rel was quantified by qRT-PCR upon YTHDF2 depletion in BCPAP and TPC-1 cells transfected with control and shMETTL3 vectors. (C) RIP-qPCR analysis using an anti-YTHDF2 antibody and IgG antibody, confirming YTHDF2 binding to c-Rel and RelA mRNA. HPRT1, reported previously to contain no m<sup>6</sup>A modifications and not to be bound by YTHDF2, was used as a negative control. (D) The decay rate of c-Rel mRNA by RT-PCR analysis at the indicated times after treatment with actinomycin D in BCPAP and TPC-1 cells after YTHDF2 inhibition. (E) RT-PCR analysis of the mRNA stability of c-Rel in KTC-1 cells stably expressing METTL3 with or without YTHDF2 knockdown. (F and G) METTL3-silenced or -overexpressing PTC cells were treated with actinomycin D and harvested at 0, 3, and 6 h. The mRNA level of RelA was normalized to expression at 0 h and measured by RT-PCR. (H and I) CCK-8 (H) and Transwell (I) assays showing the proliferation and migration ability of KTC-1 cells transfected with the indicated plasmids. Data represent the mean  $\pm$  SD (\* $p$  < 0.05, \*\* $p$  < 0.01, \*\*\* $p$  < 0.001; n.s., not significant).

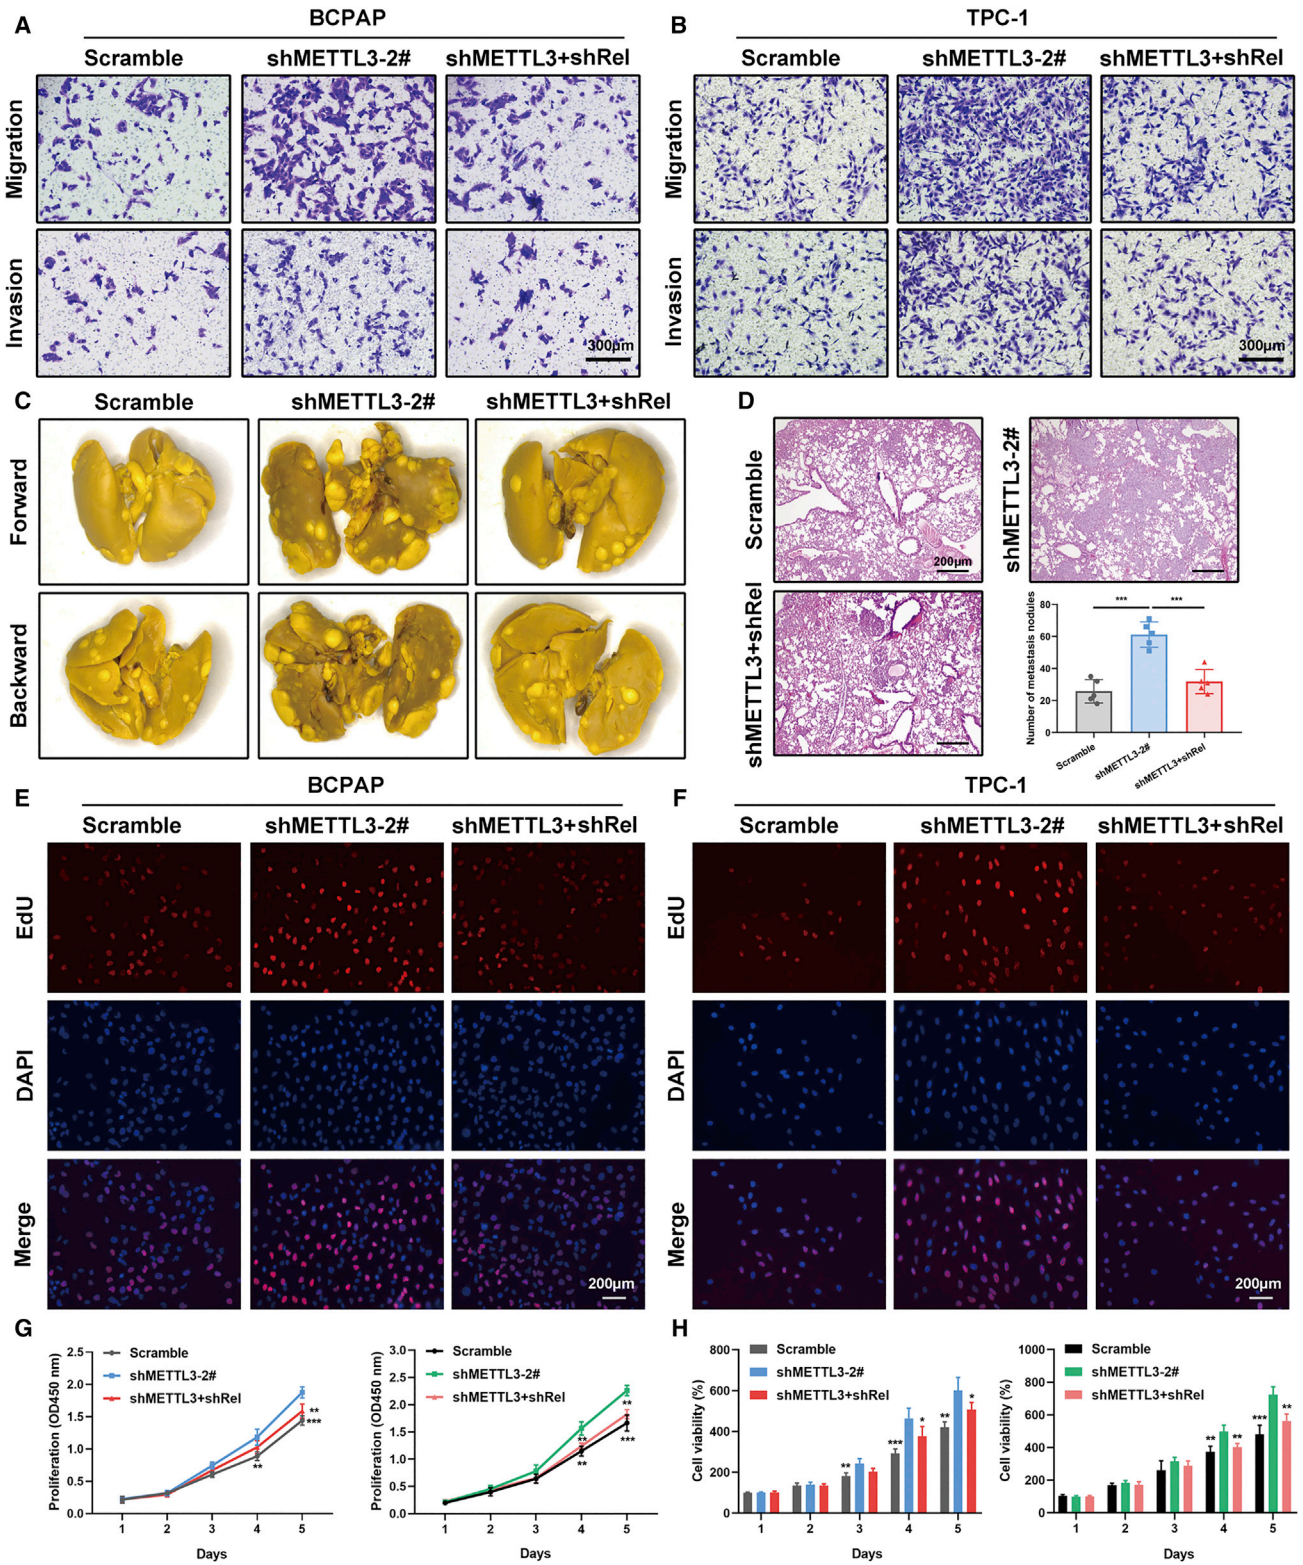

(legend on next page)

METTL3-overexpressing mice exhibited a lower positive rate of c-Rel and RelA, reaffirming inactivation of the NF- $\kappa$ B pathway upon METTL3 overexpression (Figure 7H). Our results clarify the critical role of c-Rel in METTL3-mediated PTC progression *in vitro* and *in vivo*.

### IL-8 recruits neutrophils to facilitate METTL3-deficient tumor cell growth

Given the core contribution of the NF- $\kappa$ B signaling pathway to the inflammatory tumor microenvironment, a proteome profiler human cytokine array was implemented to visualize the cytokine and chemokine profile changes following METTL3 knockdown in PTC cells. We found that inhibition of METTL3 presented with elevated levels of a series of inflammatory cytokines, including CXCL1, CXCL11, IL-6, IL-8, and TREM1. Anti-inflammatory cytokines, especially IL-4 and IL-10, were decreased after knockdown of METTL3 (Figure 8A). IL-8 was shown to be robustly enriched in BCPAP and TPC-1 cells with METTL3 silencing and was selected for further research. We measured the IL-8 levels in culture media of indicated PTC cells and verified that genetic silencing of METTL3 augmented IL-8 production, as evidenced by ELISA. Intriguingly, the NF- $\kappa$ B pathway inhibitor BAY 11-7082 could noticeably reduce IL-8 levels, indicating a critical role of this pathway in regulating IL-8 expression (Figure 8B). In addition, RT-PCR analysis revealed that loss of c-Rel or blockade of the NF- $\kappa$ B pathway attenuated the induction of silencing METTL3 on IL-8. In contrast, ectopic expression of METTL3 decreased the mRNA level of IL-8 (Figures S8A and S8B). We next determined the IL-8 concentration in serum collected from individuals with PTC and healthy donors. ELISAs showed that IL-8 protein levels were consistently elevated in serum from individuals with PTC compared with serum from healthy donors (Figure 8C). Data from TCGA also showed a pronounced increase in IL-8 mRNA levels in PTC samples (Figure 8D). IL-8 has been reported previously to be able to attract neutrophils to inflammatory foci.<sup>14</sup> We wanted to ascertain the relevance of IL-8 and the NF- $\kappa$ B pathway to TAN regulation. Subcutaneous tumor tissues from BCPAP cells with the indicated vectors were dissociated and analyzed by flow cytometry. Knockdown of METTL3 in BCPAP cells indeed increased the population of TANs in the tumors, as shown by CD45<sup>+</sup>CD11b<sup>+</sup>Ly6G<sup>+</sup> numbers, whereas inhibition of c-Rel could block TAN recruitment (Figure 8E). In contrast, overexpression of METTL3 in KTC-1 xenograft tumors showed less TAN infiltration, as depicted in Figure S8C. Next we performed chemotaxis assays using a Transwell co-culture system. Conditional medium from cultures of METTL3 knockdown

or control BCPAP or TPC-1 cells was placed in the bottom wells, and freshly isolated TANs from PTC cell-bearing mice were seeded in the upper chambers. The chemotaxis assays results showed that the migration index of TANs was increased markedly following co-culture with METTL3-deleted cells (Figure 8F). In contrast, conditional medium from METTL3-overexpressing cells weakened the migration of TANs compared with that from control KTC-1 cells or METTL3 mutant cells. Notably, these chemotactic effects were apparently blocked with an IL-8-neutralizing antibody or inhibition of c-Rel or RelA (Figures S8D and S8E). Considering that IL-8-related chemo-attraction could be advantageous to tumors, we explored the possibility of therapeutic inhibition targeting IL-8 in PTC cells. Equal amounts of BCPAP cells stably expressing shMETTL3 or a control vector were injected subcutaneously into nude mice (10 mice per group). When palpable tumors formed on day 14, mice in each group were divided randomly into two subgroups, and the IL-8 antagonist SB225002 or its carrier solution, DMSO, was administered intraperitoneally into tumor-bearing mice 3 times per week (Figure 8G). After monitoring for 7 weeks, we found that SB225002 showed satisfactory anti-tumor efficacy in PTC cells (Figures 8H and 8I). Treatment with the IL-8 antagonist SB225002 also suppressed TAN recruitment to tumors in the control and shMETTL3 groups (Figure 8J). We demonstrate that silencing of METTL3 elevates IL-8 expression, promoting TAN recruitment, and that blockade of IL-8 suppresses TAN accumulation and tumorigenesis in PTC cells.

To illustrate the clinical relevance of the METTL3/c-Rel/IL-8 axis in promoting PTC progression, we examined the expression levels of METTL3, c-Rel, IL-8, and MPO (a marker of neutrophil infiltration) in 42 individuals with PTC by RT-PCR. Expression of METTL3 was negatively correlated with the levels of c-Rel and IL-8. We also observed an inverse relationship between METTL3 and MPO in individuals with PTC (Figure S9A). Furthermore, we evaluated the prognostic value of downstream METTL3 targets in clinical samples. Individuals with PTC with increased c-Rel and IL-8 levels had shorter RFS compared with individuals who had low levels of c-Rel and IL-8, as shown via the bioinformatics tool Kaplan-Meier Plotter (Figure S9B). These results underpin the clinical significance of downstream METTL3 targets in individuals with PTC.

## DISCUSSION

Many studies have investigated epitranscriptomics over the past decades because of recent technical advances in characterizing RNA modifications.<sup>15,16</sup> It is generally assumed that more than 100 RNA

### Figure 6. c-Rel is critical for METTL3-regulated PTC cells metastasis and proliferation

(A and B) Effects of c-Rel on migration and invasion of BCPAP (A) and TPC-1 (B) cells with the shMETTL3 vector. Inhibition of c-Rel rescued metastasis in METTL3 knockdown PTC cells. Magnification, 200 $\times$ . Scale bar, 300  $\mu$ m. (C) Representative views of lung metastasis foci in the tail vein metastasis model in the tested mice (n = 5 mice per group). (D) Representative microscopic views of lung metastasis foci from H&E staining and statistical analysis of metastatic lung nodules at the endpoint (8 weeks). Magnification, 50 $\times$ . Scale bar, 200  $\mu$ m. (E and F) Representative micrographs of EdU incorporation assays with the indicated BCPAP (E) and TPC-1 (F) cells. Magnification, 200 $\times$ . Scale bar, 200  $\mu$ m. (G) A CCK-8 assay was performed to measure proliferation of PTC cells transfected with shMETTL3 and shMETTL3 plus shRel compared with those transfected with a scramble vector. (H) Cell viability was also investigated by CellTiter-Glo luminescence assays in BCPAP and TPC-1 cells. Data are presented as the mean  $\pm$  SD from triplicate experiments (\*p < 0.05, \*\*p < 0.01, \*\*\*p < 0.001).



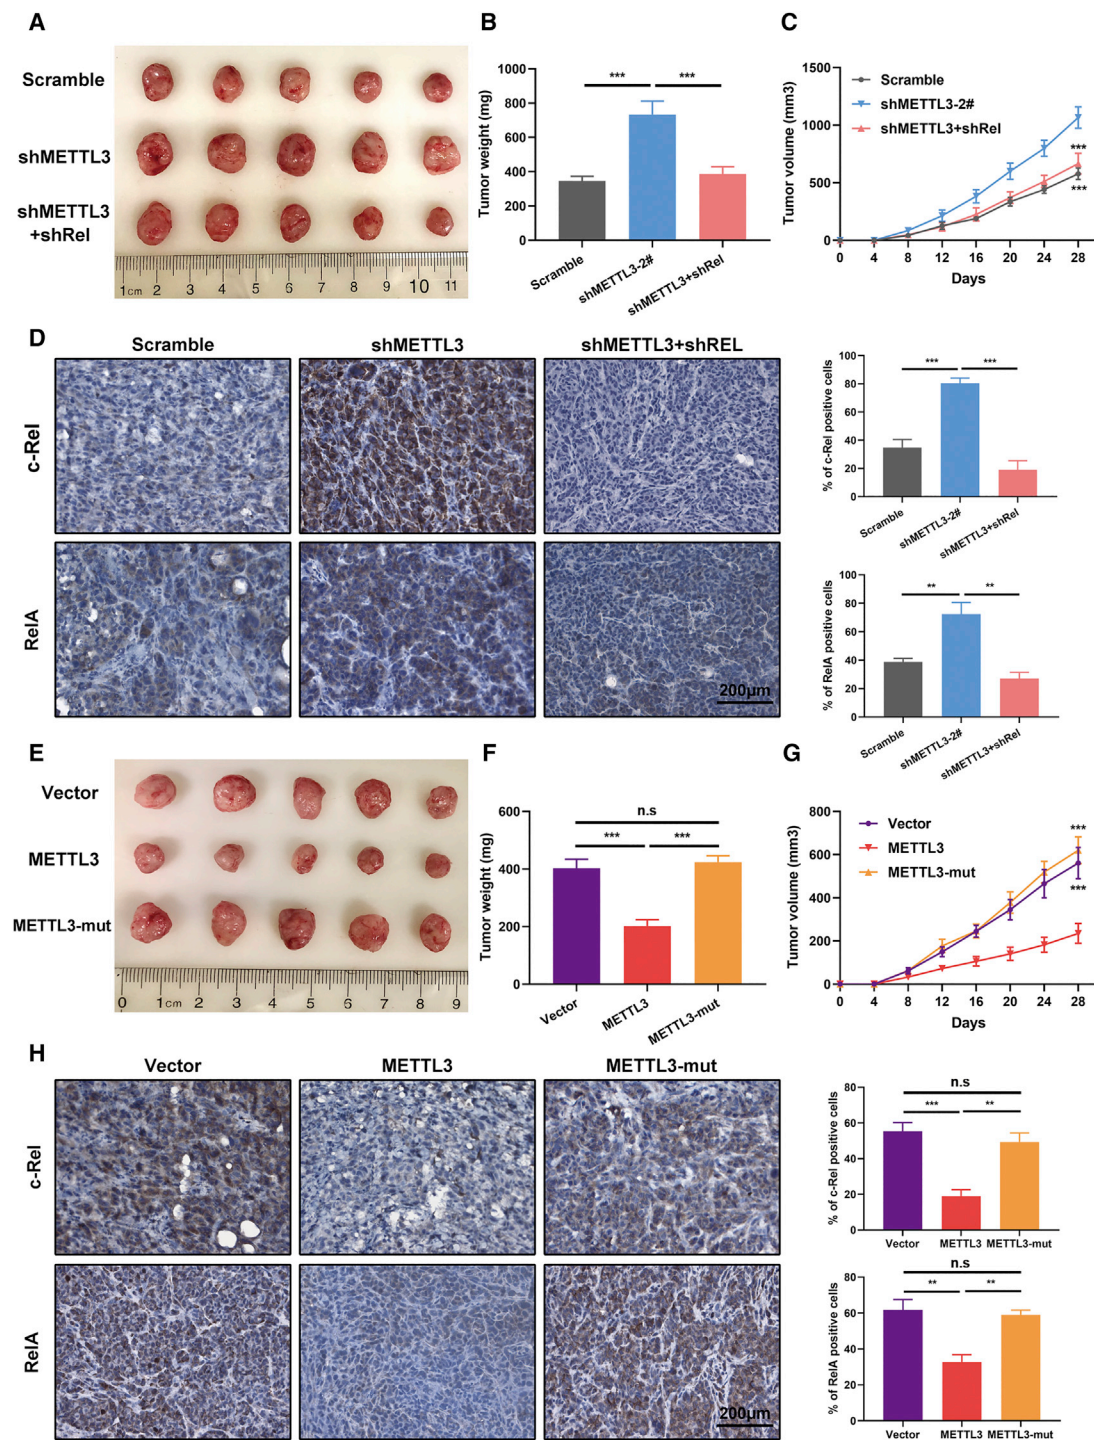

**Figure 7. Inhibition of METTL3 has a tumor-promoting effect *in vivo***

(A) Representative pictures of tumors harvested from BCPAP xenografts transfected with scramble negative control, shMETTL3, and shMETTL3 with shRel in BALB/c nude mice. (B and C) Relative tumor weights (B) and volumes (C) of mice bearing BCPAP cells with the indicated vectors (n = 5 mice per group). (D) Representative IHC images of c-Rel and RelA staining in serial sections of tumor tissues isolated from xenograft models and statistical analysis of c-Rel<sup>+</sup> and RelA<sup>+</sup> cells in the indicated groups of tumors.

(legend continued on next page)

modifications exist in mammalian cells. Among these distinct chemical modifications, m<sup>6</sup>A RNA methylation, the most prevalent RNA modification in eukaryotic cells, performs a great diversity of biological functions in normal development and disease, including initiating translation, stabilizing transcripts, splicing pre-mRNA, and facilitating nuclear export.<sup>17,18</sup> In this study, we investigated the expression profiles of m<sup>6</sup>A RNA methylation-related proteins in PTC tissues and paired normal thyroid tissues. We focused on METTL3, the first documented methyltransferase for m<sup>6</sup>A modification, which is frequently silenced in individuals with PTC and functions as a tumor suppressor in PTC cells. Gain- and loss-of-function studies uncovered that METTL3 regulates PTC cell proliferation and spread *in vitro* and *in vivo* and that these effects rely on the m<sup>6</sup>A catalytic activity of METTL3.

As a highly dynamic mRNA modification, m<sup>6</sup>A methylation is catalyzed by methyltransferases (also known as writers), demethylases (erasers), and binding proteins (readers). Lin et al.<sup>19</sup> provided the first report about METTL3 in cancer; they uncovered a key role of METTL3 in promoting translation of oncogenes such as epidermal growth factor receptor (EGFR) and Tafazzin (TAZ) and accelerating growth and survival of human lung cancer cells. Since then, the controversial METTL3 has been intensively investigated in multiple malignancies. METTL3 has tumor-promoting effects in gastric cancer, colorectal cancer, liver cancer, and bladder cancer and presents opposite patterns in glioblastoma, endometrial cancer, and renal cell carcinoma.<sup>20–26</sup> Cui et al.<sup>24</sup> found that inhibition of METTL3 promotes tumorigenesis and self-renewal of glioblastoma stem cells (GSCs) by elevating the expression of oncogenes (ADAM19, EPHA3, and KLF4) and downregulating tumor suppressors (CDKN2A and BRCA2). Another group discovered that METTL3 was elevated in GSCs and increased SOX2 mRNA stability and expression to maintain neurosphere formation, whereas METTL3 silencing diminished glioblastoma propagation *in vivo*.<sup>27</sup> These contradictory results reflect the complicated role of METTL3 in tumor progression. To date, the biological function and clinical implication of METTL3 in PTC are not fully understood. A new report shows that METTL3 aggravates progression of thyroid carcinoma by regulating m<sup>6</sup>A methylation of TCF1 to activate the Wnt pathway.<sup>28</sup> The researchers concluded that METTL3 is upregulated in thyroid carcinoma by simply examining 24 paracancerous thyroid tissues as a control group without detecting the protein levels of METTL3 or the intrinsic m<sup>6</sup>A level in thyroid cancer tissues. It is also unclear which subtype of thyroid cancer were used in this study. Here, using high-throughput RNA-seq and MeRIP-seq, we identified c-Rel and RelA as *bona fide* m<sup>6</sup>A targets of METTL3. The tumor-suppressive function of METTL3 was mediated by increasing m<sup>6</sup>A levels and directly destabilizing c-Rel mRNA together with YTHDF2, inactivating the

NF- $\kappa$ B pathway. The m<sup>6</sup>A modification machinery is delicately balanced, relying on cooperation of writers and readers. The YTH family is the largest family of m<sup>6</sup>A reader proteins, containing YTHDF1–YTHDF3, YTHDC1, and YTHDC2. YTHDF2 is the first characterized m<sup>6</sup>A reader that mediates mRNA degradation by specifically recognizing m<sup>6</sup>A-containing transcripts and recruiting them to mRNA decay sites. Chen et al.<sup>29</sup> showed that upregulated YTHDF2 in pancreatic tumor cells accelerates cell proliferation but impedes tumor migration and invasion, validating the dual role of YTHDF2 and providing evidence for the “migration-proliferation dichotomy” theory. Another study proved that YTHDF2 might serve as a tumor suppressor by facilitating degradation of EGFR mRNA in hepatocellular carcinoma.<sup>30</sup> Here we found that YTHDF2 exercised its suppressing function by binding to the c-Rel transcript and negatively modulating c-Rel mRNA stability, consequently impeding cell proliferation and migration. To our knowledge, this is the first report regarding the physiological function of YTHDF2 and its target mRNA in PTC.

Tumor-related inflammation is considered an important hallmark of cancer.<sup>31</sup> Tumor cells communicate with multiple types of immune cells (e.g., lymphocytes, macrophages, neutrophils, and dendritic cells) in the tumor microenvironment, and this crosstalk implies paradoxical roles in promoting and inhibiting cancer progression, depending on the context.<sup>32,33</sup> Ample evidence has emphasized that PTC possesses an inflammatory tumor microenvironment.<sup>34</sup> Understanding this will be of paramount importance to develop targeting therapy against the components of the tumor microenvironment. Neutrophils comprise around 70% of circulating leukocytes in the human body, and the primary function of neutrophils is defense against extracellular pathogens. TANs play various and conflicting roles in cancer, including sustaining tumor angiogenesis, stimulating tumor cell proliferation, and promoting tumor cell dissemination.<sup>35</sup> TANs have also been documented to possess anti-tumor properties, evoking an adaptive immune response and secreting cytotoxic mediators to render tumor cells more susceptible to apoptosis.<sup>36</sup> The neutrophil-to-lymphocyte ratio (NLR) has been proposed as an easily visible indicator of the systemic inflammatory response in individuals with tumors. A previous study supports that a higher blood NLR is positively correlated with larger tumor size and a higher risk of recurrence in individuals with thyroid cancer, but the authors could not detect benign or malignant thyroid nodules.<sup>37</sup> The functional state of neutrophils in development of PTC remains to be determined. Our data elucidate that METTL3 deficiency was capable of activating the NF- $\kappa$ B pathway and increasing IL-8 production. Inhibition of the NF- $\kappa$ B pathway with BAY 11-7082 could block IL-8 secretion from PTC cells, and an IL-8-neutralizing antibody abolished the enhanced chemotactic effect of METTL3 knockdown PTC cells on

---

Magnification, 200 $\times$ . Scale bar, 200  $\mu$ m. (E) Primary tumor samples from mice with subcutaneous injection of KTC-1 cells transfected with different vectors. (F) Relative tumor weights were measured at the endpoint. (G) Primary tumor growth curves of the indicated groups monitored every 4 days (n = 5 biologically independent samples). (H) Representative IHC staining images showing expression of c-Rel and RelA in xenograft tumor tissues and quantification of c-Rel<sup>+</sup> and RelA<sup>+</sup> cells in the indicated subcutaneous xenograft tumors. Magnification, 200 $\times$ . Scale bar, 200  $\mu$ m. Data represent the mean  $\pm$  SD (\*\*p < 0.01, \*\*\*p < 0.001).

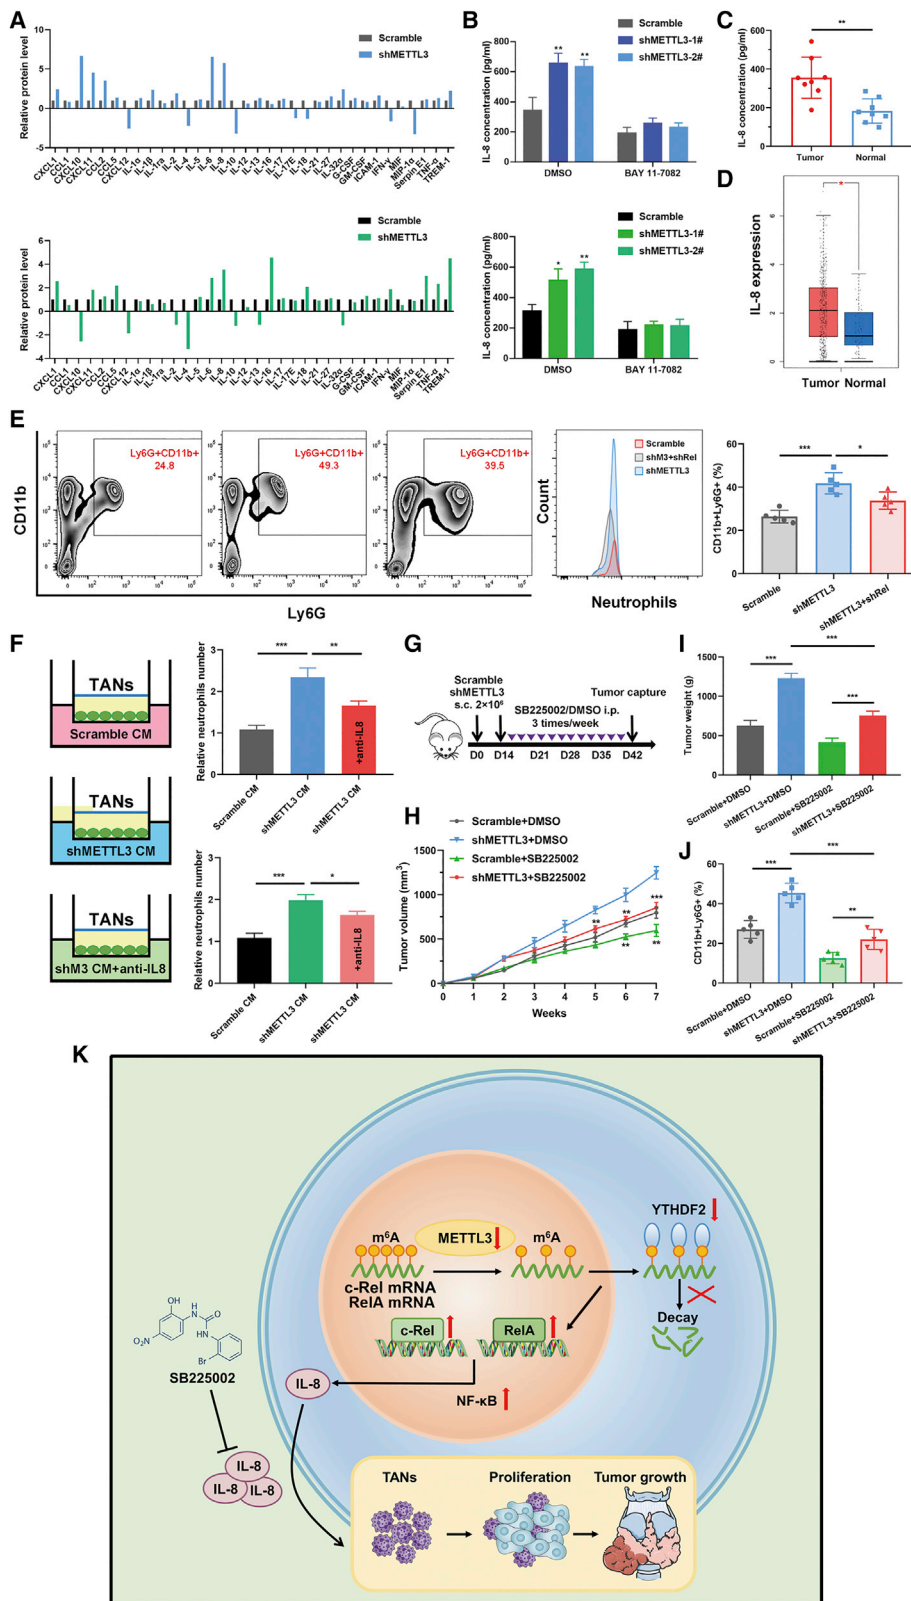

(legend on next page)



TANs. Last, targeting IL-8 with SB225002 achieved satisfactory anti-neoplastic effects by selectively eliminating neutrophils in the PTC model. Our research provides a scientific basis for the importance of TANs in the tumor microenvironment for progression of PTC.

In summary, we observed reduced METTL3 expression and overall m<sup>6</sup>A methylation levels in PTC tissues and cell lines. METTL3 recognized c-Rel and RelA m<sup>6</sup>A modification and collaborated with YTHDF2 in regulating c-Rel and RelA mRNA stability to trigger the NF- $\kappa$ B signaling pathway. METTL3 deficiency elevated IL-8 production of PTC cells to recruit TANs, ultimately promoting PTC progression. Being the first study to establish the link between m<sup>6</sup>A RNA methylation and TANs, our results underscore the crucial significance of m<sup>6</sup>A methylation in regulating PTC cell biology and offers a rationale for promising therapeutic targeting of m<sup>6</sup>A modulators in PTC.

## MATERIALS AND METHODS

### Human PTC samples

Primary PTC cancerous tissues, their matching adjacent normal thyroid tissues, and healthy control samples were obtained from the First Affiliated Hospital of Zhengzhou University. All individuals with PTC were diagnosed for the first time, did not receive any treatment prior to surgery, and then PTC was confirmed histologically and classified according to the American Joint Committee on Cancer (AJCC) staging system. This study was approved by the Ethics Committee of the First Affiliated Hospital of Zhengzhou University, and written informed consent was obtained from each participant.

### Cell culture and chemicals

The human PTC cell lines BCPAP and KTC-1 were cultured in RPMI 1640 medium (HyClone, USA) supplemented with 10% fetal bovine serum (FBS; Gibco, USA) and penicillin-streptomycin solution (Gibco, USA). Human immortalized thyroid cells (Nthy-ori 3-1) and PTC cells (TPC-1) were maintained in high-glucose DMEM (HyClone, USA). All cultured cells were tested regularly for mycoplasma contamination and authenticated by short tandem repeat (STR) profiling. The internal m<sup>6</sup>A inhibitor DAA was obtained from Sigma (St. Louis, MO, USA). The NF- $\kappa$ B inhibitor BAY 11-7082 and the IL-8/CXCR2 inhibitor SB225002 were purchased from Selleckchem (Houston, TX, USA). Recombinant human tumor

necrosis factor alpha (TNF- $\alpha$ ) protein was obtained from R&D Systems (Minneapolis, MN, USA).

### IHC and immunofluorescence staining

Paraffin-embedded PTC tissues were sliced into 4- $\mu$ m thickness and incubated overnight at 60°C. Next, the slides were deparaffinized, hydrated, and boiled for 30 min in citrate buffer (pH 6.0). The IHC staining index was determined based on the product of the proportion of positively stained tumor cells and the staining intensity score, as described previously.<sup>38</sup> For immunofluorescence staining, cells were cultured on coverslips and fixed using 4% paraformaldehyde for 15 min, permeabilized with 0.5% Triton X-100 for 15 min, and washed with PBS, followed by blocking in 5% bovine serum albumin (BSA) for 1 h and incubation with anti-METTL3 (1:200 dilution) at 4°C overnight. Immunofluorescence was visualized with a fluorescence microscope (Leica, Wetzlar, Germany).

### Western blot

Tissues and cells were lysed in ice-cold RIPA lysis buffer (Beyotime Biotechnology, China) supplemented with protease inhibitors. Protein concentrations were measured with the Rapid Gold BCA Protein Assay Kit (Thermo Fisher Scientific, USA). Equal amounts of proteins were resolved on SDS-PAGE gel and transferred electrophoretically onto polyvinylidene fluoride (PVDF) membranes. The antibodies used in this study were as follows: anti-METTL3 (bs-17609R, BIOSS), anti-c-Rel (4727, Cell Signaling Technology), anti-RelA (8242, Cell Signaling Technology), anti-m<sup>6</sup>A antibody (ab208577, Abcam), anti-YTHDF2 (ab220163, Abcam), and anti- $\beta$ -actin (4970, Cell Signaling Technology).

### RNA extraction, quantitative real-time PCR, and mRNA stability assays

Total RNA was isolated from tissues and cells with TRIzol reagent (Life Technologies, Carlsbad, CA, USA), and reverse transcription was performed with the PrimeScript RT Reagent Kit with gDNA Eraser (TaKaRa, Dalian, China). Real-time PCR was conducted with TB Green Premix Ex Taq (TaKaRa, Dalian, China). Relative mRNA expression was determined using the 2<sup>- $\Delta\Delta$ Ct</sup> method, and  $\beta$ -actin was applied as the internal control for normalization. Detailed primer sequences are listed in Table S1. To evaluate the mRNA stability of different PTC cells, actinomycin D (Sigma, USA) at 5  $\mu$ g/mL

## Figure 8. The METTL3/c-Rel/IL-8 axis regulates neutrophil recruitment in the PTC cell microenvironment

(A) A series of human cytokines and chemokines of cell lysates from BCPAP (top panel) and TPC-1 (bottom panel) cells transfected with the control and shMETTL3 vectors were detected using the Proteome Profiler Human Cytokine Array Kit. The relative level was based on the intensities normalized to the positive controls on the same membrane. (B) Protein expression of IL-8 in BCPAP (top panel) and TPC-1 (bottom panel) cells with the indicated vectors in the presence or absence of the NF- $\kappa$ B inhibitor BAY 11-7082 by ELISA. (C) ELISA of serum IL-8 concentrations from individuals with PTC and healthy donors (n = 8 for each group). (D) The mRNA level of IL-8 in PTC tumor tissues and normal thyroid tissues from the GEPIA database. (E) Tumors samples were collected from subcutaneous models, and the proportions of CD11b<sup>+</sup>Ly6G<sup>+</sup> cells in the CD45<sup>+</sup> cell population were determined by flow cytometry. (F) The Transwell system was used to detect neutrophil chemotaxis. TANs were seeded in the upper chamber, and conditioned medium from shMETTL3 or control BCPAP and TPC-1 cells was placed in the lower chamber added IL-8 neutralizing antibody. (G) A schematic of subcutaneous injection of control and shMETTL3 BCPAP cells with SB225002 or DMSO into nude mice. (H) Relative tumor volumes of different groups, monitored every week; treatment started after week 2 (n = 5 mice per group). (I) Tumor weight was measured after sacrifice in the indicated groups. (J) Flow cytometric analyses of tumor cells derived from subcutaneous BCPAP cells treated with SB225002 or DMSO. The percentage of neutrophils relative to CD45<sup>+</sup> cell count is plotted. (K) Schematic summarizing the METTL3/c-Rel/IL-8 axis and its role in modulating PTC progression. Data represent the mean  $\pm$  SD (\*p < 0.05, \*\*p < 0.01, \*\*\*p < 0.001).

was added. After incubation for the indicated times, cells were harvested, and total RNA was isolated for real-time PCR to detect stability.

### Plasmid construction

The cDNA encoding the METTL3 CDS region was amplified and cloned into the pCDH-CMV-MCS-EF1-Puro lentivirus vector. The catalytic mutant METTL3 (residues 395–398, DPPW–APPA) was synthesized by GENEWIZ using the same vector for as wild-type METTL3. shRNAs targeting human METTL3, c-Rel, or RelA were cloned into pLKO.1-puro. siRNA targeting human YTHDF2 was purchased from GenePharma (Shanghai, China). All constructed vectors were verified by DNA sequencing. The targeting sequences were as follows: shMETTL3-1, 5'-GCAAGTATGTTCACAT-GAAA-3'; shMETTL3-2, 5'-GCCAAGGAACAATCCATTGTT-3'; shRel, 5'-GCAGGAATCAATCCATTCAAT-3'; shRelA, 5'-CAC-CATCAACTATGATGAGTT-3'; siYTHDF2, 5'-AAGGACGTTCC-CAATAGCCAA-3'. Plasmid transfection into 293T cells was accomplished using Lipofectamine 3000 (Invitrogen, USA) with Opti-MEM I reduced serum medium (Gibco, USA) and packaging vectors (psPAX2 and pMD2.G). Viral supernatant was harvested 48 h after transfection, passed through a 0.45- $\mu$ m filter, and then used to infect the target cells at 50% confluence.

### Functional assays *in vitro*

The CCK-8, EdU, colony formation, and Transwell migration and invasion assays were performed as described previously.<sup>39</sup> The viability of PTC cells was also measured with a CellTiter-Glo luminescence assay (Promega, USA) according to the manufacturer's protocols. PTC cells were seeded at 2,000 cells per well in an opaque, flat-bottomed, 96-well plate and cultured continuously for 5 days. Cell viability was confirmed by measuring the luminescence signal of each well using a luminescence plate reader and incubation with CellTiter-Glo reagent for 10 min at room temperature.

### RNA-seq and meRIP-seq

For RNA-seq, total RNA was first extracted from BCPAP and TPC-1 cells with stable METTL3 knockdown and vector-transfected cells. Total RNA of each sample was extracted by RNeasy Mini Kit (QIAGEN, USA), and the quality and quantity of the RNA were assessed using the 2100 Bioanalyzer (Agilent Technologies, Santa Clara, CA, USA). Poly(A) mRNA isolation was performed using a poly(A) mRNA magnetic isolation module. RNA libraries were multiplexed and loaded on an Illumina HiSeq platform, and the sequences were processed and analyzed by GENEWIZ (Suzhou, China). Transcripts in fasta format were converted from known gff annotation files and indexed properly. Then, with the file as a reference gene file, HTSeq (version 0.6.1) was employed to estimate gene and isoform expression levels from the paired-end clean data. For meRIP-seq, total RNAs were isolated from METTL3-depleted or control TPC-1 cells using the Arraystar Seq-Star Poly(A) mRNA Isolation Kit. The extracted mRNA was chemically fragmented into approximately 100-nt fragments and immunoprecipitated with anti-m<sup>6</sup>A antibody. The eluted m<sup>6</sup>A mRNA fragments

were then concentrated for RNA-seq library construction using the KAPA Stranded mRNA-Seq Kit (Illumina) and sequenced on the Illumina HiSeq 4000 platform. The rest of the RNAs were used for meRIP-qPCR to detect the m<sup>6</sup>A levels of c-Rel and RelA and normalized to the input mRNAs. Differential expression analysis was conducted using the DESeq2 Bioconductor package, and an adjusted p value of less than 0.05 was set as a cutoff criterion. Functional enrichment analysis was performed by R Package clusterProfiler (version 3.10.1).

### RIP

The indicated cells were lysed in Polysome lysis buffer containing 10 mM HEPES-NaOH (pH 7.0), 100 mM KCl, 5 mM MgCl<sub>2</sub>, 0.5% NP40, 1 mM DTT, 200 U/mL SUPERase in RNase inhibitor (Invitrogen, USA), and protease inhibitor cocktails. Then Pierce protein A/G magnetic beads (Thermo Scientific, USA) were washed with NT-2 buffer (50 mM Tris-HCl [pH 7.4], 150 mM NaCl, 1 mM MgCl<sub>2</sub>, and 0.05% NP-40), and anti-YTHDF2 or immunoglobulin G (IgG) antibody was added to the beads and incubated with rotation for 2 h. Cellular lysates were immunoprecipitated to each antibody bead tubes on a rocker at 4°C overnight. After washing five times with NT-2 buffer and incubation at 55°C for 30 min with proteinase K buffer to remove the proteins, the co-precipitated RNAs were extracted for detection of c-Rel expression by qRT-PCR.

### Luciferase reporter assay

An NF- $\kappa$ B reporter kit (BPS Bioscience, San Diego, CA, USA) was utilized to monitor NF- $\kappa$ B pathway activity. Briefly, the pNF- $\kappa$ B-Luc reporter vector and *Renilla* luciferase vector were co-transfected into PTC cells using Lipofectamine 3000, and the relative luciferase activity was evaluated with the Dual-Luciferase Reporter Assay System (Promega, Madison, WI, USA) 24 h after transfection. Fragments of the c-Rel-3' UTR containing the wild-type m<sup>6</sup>A motifs and mutant m<sup>6</sup>A motifs were constructed by GENEWIZ (Suzhou, China) and fused into the pmirGlo dual-luciferase expression vector (Promega, Madison, WI, USA). The relative level of firefly luciferase activity was normalized to the *Renilla* luciferase activity levels and represents the effect of m<sup>6</sup>A modification on c-Rel expression.

### Analysis of TANs

Tumor tissues from BALB/c nude mice were excised into small pieces and digested with 1 mg/mL collagenase D (Sigma, USA) and 100  $\mu$ g/ml DNase I (STEMCELL Technologies, USA) in PBS with 5% FBS for 1 h in a 37°C shaker. Then digested tumor tissues were passed through 70- $\mu$ m cell strainers, and mononuclear cells were collected on the interface fraction between 40% and 70% Percoll density gradient medium (GE Healthcare). After blocking with rat anti-mouse CD16/CD32 antibody (BD Pharmingen), cells were stained with PerCP-Cy5.5 anti-CD45, anti-PE-Cy7 anti-CD11b, and fluorescein isothiocyanate (FITC) anti-Ly6G (BioLegend) for analysis of proportions of neutrophils in the tumor microenvironment or sorted by FACSaria Cell Sorter (BD Biosciences) for further experiments.

### Chemotaxis assay

The *in vitro* chemotaxis assay was performed using a filter Transwell system (3.0- $\mu$ m pore size). In brief, TANs were collected from subcutaneous tumors in mice and sorted by flow cytometry.  $5 \times 10^4$  TANs were suspended in RPMI 1640 medium with 5% FBS and seeded into the upper chamber and then incubated at 37°C for 3 h. Conditioned medium (CM) from PTC cell lines with METTL3, mutant METTL3, or shMETTL3 plasmids, and their corresponding control cells were placed in the bottom chamber. The subsequent steps were identical to those used in the cell migration assay. Specifically, a neutralizing antibody against IL-8 was added to CM from the shMETTL3 group to elucidate the chemotactic effect.

### ELISA

RNA m<sup>6</sup>A quantification in PTC tissue and cell lines was performed by colorimetric ELISA using the EpiQuik m<sup>6</sup>A RNA Methylation Quantification Kit (Epigentek, USA), following the manufacturer's protocol. 200 ng of RNA was coated into each well, and the absorbance was read on a microplate reader at 450 nm. The IL-8 levels in CM from different PTC cells and sera from individuals with PTC were detected using the Human IL-8 Quantikine ELISA Kit (R&D Systems, USA).

### Animal models

All animal procedures were approved by the Institutional Animal Care and Use Committee of the First Affiliated Hospital of Zhengzhou University. For xenograft models,  $5 \times 10^6$  BCPAP or KTC-1 cells from each group were injected subcutaneously into the flanks of female BALB/c nude mice (4–6 weeks old, Shanghai SLAC Laboratory Animal, China, n = 5 per group) in a volume of 150  $\mu$ L PBS. Tumor growth was measured with a digital caliper every 4 days and calculated using the following formula: (length  $\times$  width<sup>2</sup>)/2. To study the effect of IL-8 on tumor growth *in vivo*, scramble or shMETTL3 BCPAP cells were implanted hypodermically into BALB/c nude mice ( $2 \times 10^6$  cells in 150  $\mu$ L PBS, n = 10 per group). When palpable tumors formed on day 14, mice were treated with DMSO or the IL-8 inhibitor SB225002 (10 mg/kg) by intraperitoneal injection 3 times per week for 3 weeks. Six weeks post-injection, the mice were sacrificed, and the tumors were collected to analyze the frequency of TANs by flow cytometry. For the lung metastasis model, BCPAP and KTC-1 cells ( $2 \times 10^6$  cells in 100  $\mu$ L PBS) with the corresponding vectors were injected into the tail veins of BALB/c nude mice. Eight weeks after injection, the mice were euthanized, and metastatic lung nodules were analyzed (n = 5 for each group).

### Statistical analysis

Experimental data are presented as mean  $\pm$  standard deviation (SD) and analyzed using GraphPad Prism 8.0 software. All *in vitro* results are representative of at least three independent trials. Two-group comparison was assessed by Mann-Whitney *U* test or Student's *t* test, and paired *t* test was employed for paired PTC and corresponding normal thyroid samples. The association between METTL3 and its downstream targets was analyzed by Pearson correlation test. A two-tailed *p* value of 0.05 was considered statistically significant.

### SUPPLEMENTAL INFORMATION

Supplemental Information can be found online at <https://doi.org/10.1016/j.ymthe.2021.01.019>.

### ACKNOWLEDGMENTS

We thank all patients enrolled in this study for their contribution to science. This work was supported by the Science and Technology Project of Henan Province of China (grant nos.192102310133 and 202102310112), the National Nature Science Foundation of China (grant no. 81702780), and the Medical Scientific Research Foundation of the Health Department of Henan Province of China (grant no. 201403077).

### AUTHOR CONTRIBUTIONS

J.H., M.Z. and F.H. conceived and designed the study. J.H., M.Z., J.Y., and J.W. performed the experiments and analyzed the data. J.C, J.J., J.S., and C.W. helped to collect the tissue samples and conduct animal experiments. J.H. and M.Z. wrote and revised the manuscript. F.H. and H.Y. supervised the study.

### DECLARATION OF INTERESTS

The authors declare no competing interests.

### REFERENCES

- Bray, F., Ferlay, J., Soerjomataram, I., Siegel, R.L., Torre, L.A., and Jemal, A. (2018). Global cancer statistics 2018: GLOBOCAN estimates of incidence and mortality worldwide for 36 cancers in 185 countries. *CA Cancer J. Clin.* 68, 394–424.
- Cabanillas, M.E., McFadden, D.G., and Durante, C. (2016). Thyroid cancer. *Lancet* 388, 2783–2795.
- Xing, M., Alzahrani, A.S., Carson, K.A., Viola, D., Elisei, R., Bendlova, B., Yip, L., Mian, C., Vianello, F., Tuttle, R.M., et al. (2013). Association between BRAF V600E mutation and mortality in patients with papillary thyroid cancer. *JAMA* 309, 1493–1501.
- Zou, M., Baitei, E.Y., Alzahrani, A.S., BinHumaid, F.S., Alkhatfaji, D., Al-Rijjal, R.A., Meyer, B.F., and Shi, Y. (2014). Concomitant RAS, RET/PTC, or BRAF mutations in advanced stage of papillary thyroid carcinoma. *Thyroid* 24, 1256–1266.
- Yao, M.D., Jiang, Q., Ma, Y., Liu, C., Zhu, C.Y., Sun, Y.N., Shan, K., Ge, H.M., Zhang, Q.Y., Zhang, H.Y., et al. (2020). Role of METTL3-Dependent N<sup>6</sup>-Methyladenosine mRNA Modification in the Promotion of Angiogenesis. *Mol. Ther.* 28, 2191–2202.
- Chen, X., Xu, M., Xu, X., Zeng, K., Liu, X., Sun, L., Pan, B., He, B., Pan, Y., Sun, H., et al. (2020). METTL14 Suppresses CRC Progression via Regulating N<sup>6</sup>-Methyladenosine-Dependent Primary miR-375 Processing. *Mol. Ther.* 28, 599–612.
- De Jesus, D.F., Zhang, Z., Kahraman, S., Brown, N.K., Chen, M., Hu, J., Gupta, M.K., He, C., and Kulkarni, R.N. (2019). m<sup>6</sup>A mRNA Methylation Regulates Human  $\beta$ -Cell Biology in Physiological States and in Type 2 Diabetes. *Nat. Metab.* 1, 765–774.
- Li, H.B., Tong, J., Zhu, S., Batista, P.J., Duffy, E.E., Zhao, J., Bailis, W., Cao, G., Kroehling, L., Chen, Y., et al. (2017). m<sup>6</sup>A mRNA methylation controls T cell homeostasis by targeting the IL-7/STAT5/SOCS pathways. *Nature* 548, 338–342.
- Dorn, L.E., Lasman, L., Chen, J., Xu, X., Hund, T.J., Medvedovic, M., Hanna, J.H., van Berlo, J.H., and Accornero, F. (2019). The N<sup>6</sup>-Methyladenosine mRNA Methylase METTL3 Controls Cardiac Homeostasis and Hypertrophy. *Circulation* 139, 533–545.
- Liu, X., Gonzalez, G., Dai, X., Miao, W., Yuan, J., Huang, M., Bade, D., Li, L., Sun, Y., and Wang, Y. (2020). Adenylate Kinase 4 Modulates the Resistance of Breast Cancer Cells to Tamoxifen through an m<sup>6</sup>A-Based Epitranscriptomic Mechanism. *Mol. Ther.* 28, 2593–2604.
- Liu, L., Wu, Y., Li, Q., Liang, J., He, Q., Zhao, L., Chen, J., Cheng, M., Huang, Z., Ren, H., et al. (2020). METTL3 Promotes Tumorigenesis and Metastasis through BMI1 m<sup>6</sup>A Methylation in Oral Squamous Cell Carcinoma. *Mol. Ther.* 28, 2177–2190.



12. Zhou, Y., Zeng, P., Li, Y.H., Zhang, Z., and Cui, Q. (2016). SRAMP: prediction of mammalian N6-methyladenosine (m6A) sites based on sequence-derived features. *Nucleic Acids Res.* *44*, e91.
13. Hunter, J.E., Leslie, J., and Perkins, N.D. (2016). c-Rel and its many roles in cancer: an old story with new twists. *Br. J. Cancer* *114*, 1–6.
14. Baggolini, M., Walz, A., and Kunkel, S.L. (1989). Neutrophil-activating peptide-1/interleukin 8, a novel cytokine that activates neutrophils. *J. Clin. Invest.* *84*, 1045–1049.
15. Hsu, P.J., Shi, H., and He, C. (2017). Epitranscriptomic influences on development and disease. *Genome Biol.* *18*, 197.
16. Nachtergaele, S., and He, C. (2018). Chemical Modifications in the Life of an mRNA Transcript. *Annu. Rev. Genet.* *52*, 349–372.
17. Wu, S., Zhang, S., Wu, X., and Zhou, X. (2020). m<sup>6</sup>A RNA Methylation in Cardiovascular Diseases. *Mol. Ther.* *28*, 2111–2119.
18. Meyer, K.D., and Jaffrey, S.R. (2014). The dynamic epitranscriptome: N6-methyladenosine and gene expression control. *Nat. Rev. Mol. Cell Biol.* *15*, 313–326.
19. Lin, S., Choe, J., Du, P., Triboulet, R., and Gregory, R.I. (2016). The m(6)A Methyltransferase METTL3 Promotes Translation in Human Cancer Cells. *Mol. Cell* *62*, 335–345.
20. Wang, Q., Chen, C., Ding, Q., Zhao, Y., Wang, Z., Chen, J., Jiang, Z., Zhang, Y., Xu, G., Zhang, J., et al. (2020). METTL3-mediated m<sup>6</sup>A modification of HDGF mRNA promotes gastric cancer progression and has prognostic significance. *Gut* *69*, 1193–1205.
21. Li, T., Hu, P.S., Zuo, Z., Lin, J.F., Li, X., Wu, Q.N., Chen, Z.H., Zeng, Z.L., Wang, F., Zheng, J., et al. (2019). METTL3 facilitates tumor progression via an m<sup>6</sup>A-IGF2BP2-dependent mechanism in colorectal carcinoma. *Mol. Cancer* *18*, 112.
22. Chen, M., Wei, L., Law, C.T., Tsang, F.H., Shen, J., Cheng, C.L., Tsang, L.H., Ho, D.W., Chiu, D.K., Lee, J.M., et al. (2018). RNA N6-methyladenosine methyltransferase-like 3 promotes liver cancer progression through YTHDF2-dependent posttranscriptional silencing of SOCS2. *Hepatology* *67*, 2254–2270.
23. Cheng, M., Sheng, L., Gao, Q., Xiong, Q., Zhang, H., Wu, M., Liang, Y., Zhu, F., Zhang, Y., Zhang, X., et al. (2019). The m<sup>6</sup>A methyltransferase METTL3 promotes bladder cancer progression via AFF4/NF-κB/MYC signaling network. *Oncogene* *38*, 3667–3680.
24. Cui, Q., Shi, H., Ye, P., Li, L., Qu, Q., Sun, G., Sun, G., Lu, Z., Huang, Y., Yang, C.G., et al. (2017). m<sup>6</sup>A RNA Methylation Regulates the Self-Renewal and Tumorigenesis of Glioblastoma Stem Cells. *Cell Rep.* *18*, 2622–2634.
25. Liu, J., Eckert, M.A., Harada, B.T., Liu, S.M., Lu, Z., Yu, K., Tienda, S.M., Chryplewicz, A., Zhu, A.C., Yang, Y., et al. (2018). m<sup>6</sup>A mRNA methylation regulates AKT activity to promote the proliferation and tumorigenicity of endometrial cancer. *Nat. Cell Biol.* *20*, 1074–1083.
26. Li, X., Tang, J., Huang, W., Wang, F., Li, P., Qin, C., Qin, Z., Zou, Q., Wei, J., Hua, L., et al. (2017). The M6A methyltransferase METTL3: acting as a tumor suppressor in renal cell carcinoma. *Oncotarget* *8*, 96103–96116.
27. Visvanathan, A., Patil, V., Arora, A., Hegde, A.S., Arivazhagan, A., Santosh, V., and Somasundaram, K. (2018). Essential role of METTL3-mediated m<sup>6</sup>A modification in glioma stem-like cells maintenance and radioresistance. *Oncogene* *37*, 522–533.
28. Wang, K., Jiang, L., Zhang, Y., and Chen, C. (2020). Progression of Thyroid Carcinoma Is Promoted by the m6A Methyltransferase METTL3 Through Regulating m<sup>6</sup>A Methylation on TCF1. *OncoTargets Ther.* *13*, 1605–1612.
29. Chen, J., Sun, Y., Xu, X., Wang, D., He, J., Zhou, H., Lu, Y., Zeng, J., Du, F., Gong, A., and Xu, M. (2017). YTH domain family 2 orchestrates epithelial-mesenchymal transition/proliferation dichotomy in pancreatic cancer cells. *Cell Cycle* *16*, 2259–2271.
30. Zhong, L., Liao, D., Zhang, M., Zeng, C., Li, X., Zhang, R., Ma, H., and Kang, T. (2019). YTHDF2 suppresses cell proliferation and growth via destabilizing the EGFR mRNA in hepatocellular carcinoma. *Cancer Lett.* *442*, 252–261.
31. Hanahan, D., and Weinberg, R.A. (2011). Hallmarks of cancer: the next generation. *Cell* *144*, 646–674.
32. Wu, T., and Dai, Y. (2017). Tumor microenvironment and therapeutic response. *Cancer Lett.* *387*, 61–68.
33. Hinshaw, D.C., and Shevde, L.A. (2019). The Tumor Microenvironment Innately Modulates Cancer Progression. *Cancer Res.* *79*, 4557–4566.
34. Cunha, L.L., Marcello, M.A., and Ward, L.S. (2014). The role of the inflammatory microenvironment in thyroid carcinogenesis. *Endocr. Relat. Cancer* *21*, R85–R103.
35. Granot, Z. (2019). Neutrophils as a Therapeutic Target in Cancer. *Front. Immunol.* *10*, 1710.
36. Granot, Z., Henke, E., Comen, E.A., King, T.A., Norton, L., and Benezra, R. (2011). Tumor entrained neutrophils inhibit seeding in the premetastatic lung. *Cancer Cell* *20*, 300–314.
37. Liu, C.L., Lee, J.J., Liu, T.P., Chang, Y.C., Hsu, Y.C., and Cheng, S.P. (2013). Blood neutrophil-to-lymphocyte ratio correlates with tumor size in patients with differentiated thyroid cancer. *J. Surg. Oncol.* *107*, 493–497.
38. He, J., Jin, Y., Zhou, M., Li, X., Chen, W., Wang, Y., Gu, S., Cao, Y., Chu, C., Liu, X., and Zou, Q. (2018). Solute carrier family 35 member F2 is indispensable for papillary thyroid carcinoma progression through activation of transforming growth factor-β type I receptor/apoptosis signal-regulating kinase 1/mitogen-activated protein kinase signaling axis. *Cancer Sci.* *109*, 642–655.
39. He, J., Zhou, M., Li, X., Gu, S., Cao, Y., Xing, T., Chen, W., Chu, C., Gu, F., Zhou, J., et al. (2020). SLC34A2 simultaneously promotes papillary thyroid carcinoma growth and invasion through distinct mechanisms. *Oncogene* *39*, 2658–2675.

YMTHE, Volume 29

## **Supplemental Information**

### **METTL3 restrains papillary thyroid cancer progression via m<sup>6</sup>A/c-Rel/IL-8-mediated neutrophil infiltration**

**Jing He, Mingxia Zhou, Jie Yin, Junhu Wan, Jie Chu, Jinlin Jia, Jinxiu Sheng, Chang Wang, Huiqing Yin, and Fucheng He**

## Supplemental Information

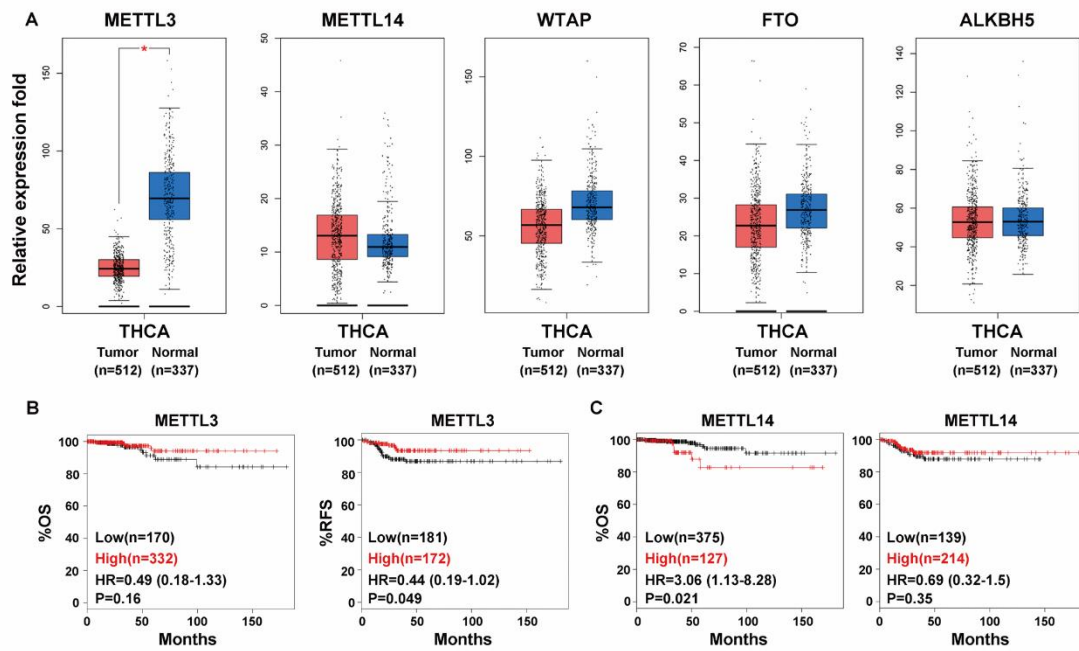

**Figure S1. Decreased METTL3 expression correlates with poor prognosis of PTC patients.**

(A) Expression profiles of METTL3, METTL14, WTAP, FTO and ALKBH5 mRNA level in primary PTC tissues and normal thyroid tissues from the GEPIA database. (B) and (C) Kaplan-Meier survival curves of overall survival (OS) and recurrent-free survival (RFS) of METTL3 and METTL14 in PTC patients from the Kaplan-Meier Plotter database. (\* $P < 0.05$ )



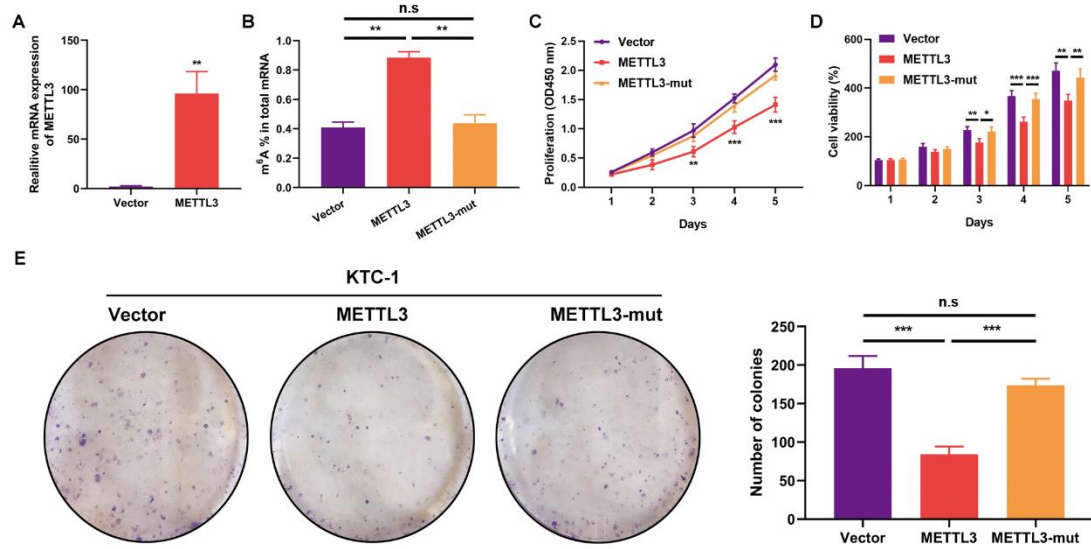

**Figure S2. METTL3 mediated m<sup>6</sup>A methylation inhibits PTC cells proliferation.**

(A) RT-PCR analysis confirming forced overexpression of METTL3 in KTC-1 cells. (B) The m<sup>6</sup>A contents of total RNAs in METTL3-overexpression and catalytic mutant METTL3 KTC-1 cells. (C) and (D) The cellular growth was analyzed by CCK8 and CellTiter-Glo Luminescence assays in KTC-1 cells transfected with METTL3 or mutant METTL3. (E) Ectopic expression of METTL3 impaired colony-formation abilities of KTC-1 cells. Quantification of the colony formation assay results was shown in the right panel. (\* $P < 0.05$ , \*\* $P < 0.01$ , \*\*\* $P < 0.001$ , n.s: not significant)

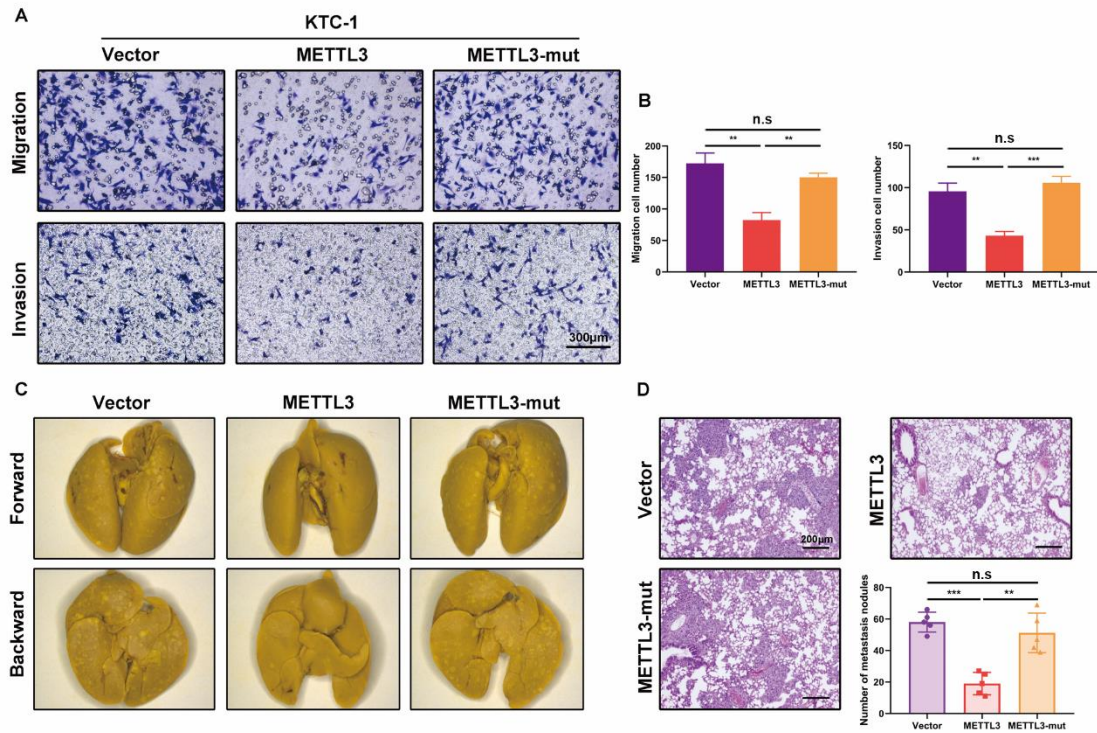

**Figure S3. Enforced Expression of METTL3 suppresses the metastasis of PTC cells.**

(A) The migration and invasive abilities were explored by transwell assays in KTC-1 cells with indicated plasmids. Magnification:  $\times 200$ . Scale bar:  $300\ \mu\text{m}$ . (B) Statistical analysis of the number of migrated and invasive cells from three independent experiments. (C) KTC-1 cells stably expressing control vector, wild-type METTL3 and mutant-METTL3 were delivered into the Balb/c nude mice by tail vein injection. Representative images of lungs were harvested at the endpoint and shown ( $n=5$  per group). (D) Representative H&E staining images and quantification of metastatic lung nodules from the indicated group of mice. Magnification:  $\times 50$ . Scale bar:  $200\ \mu\text{m}$ . (\*\* $P < 0.01$ , \*\*\* $P < 0.001$ , n.s: not significant)

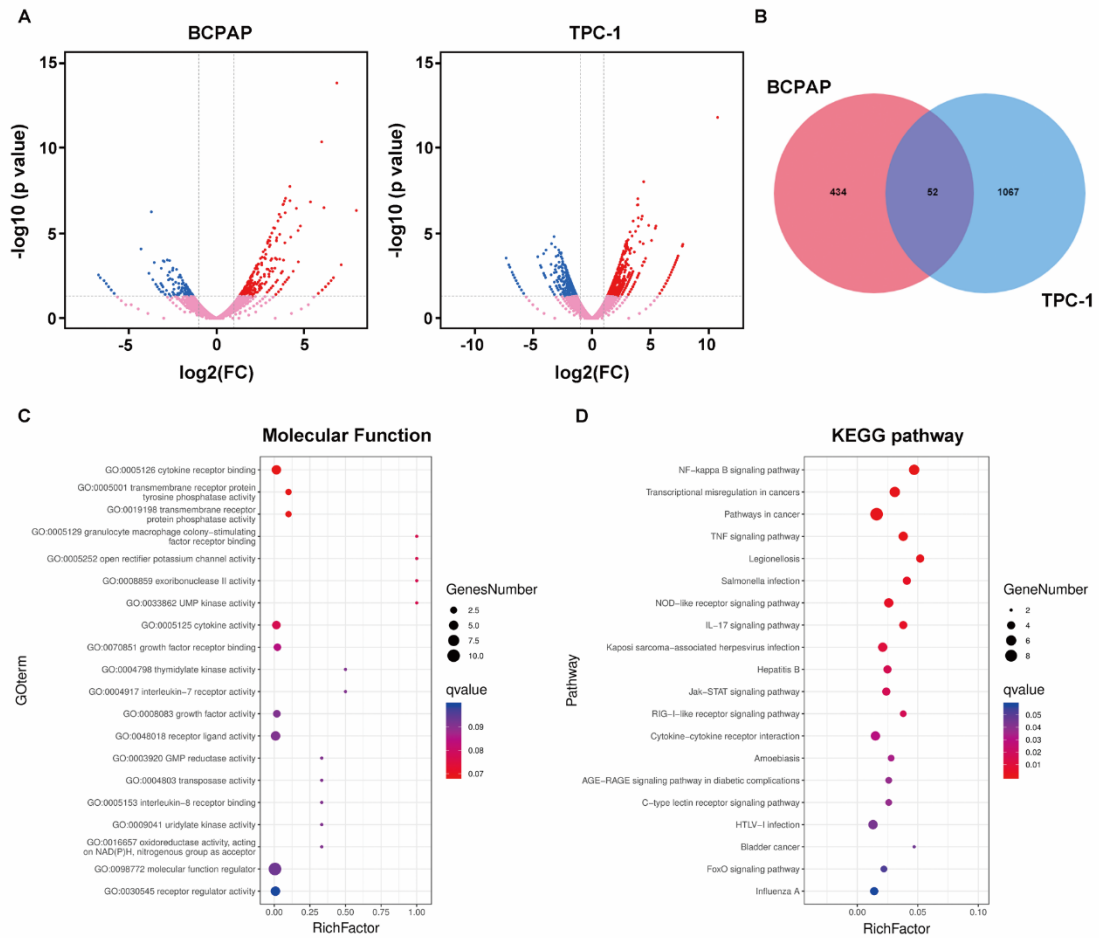

**Figure S4. Identification for potential mechanisms in METTL3-involved PTC progression.**

(A) Volcano plot illustrated differentially expressed genes between METTL3-knockdown relative to control BCPAP and TPC-1 cells based on RNA-seq data.  $|\text{Log}_2\text{FC}| > 1$  and adjusted  $P$  value  $< 0.05$  were set as cutoff criteria. (B) Venn diagram identified 52 differentially expressed genes overlap in METTL3-knockdown BCPAP and TPC-1 cells when compared to the control group. (C) and (D) Gene Ontology (GO) and KEGG enrichment analysis were performed based on 52 common differentially expressed genes in both BCPAP and TPC-1 cells.



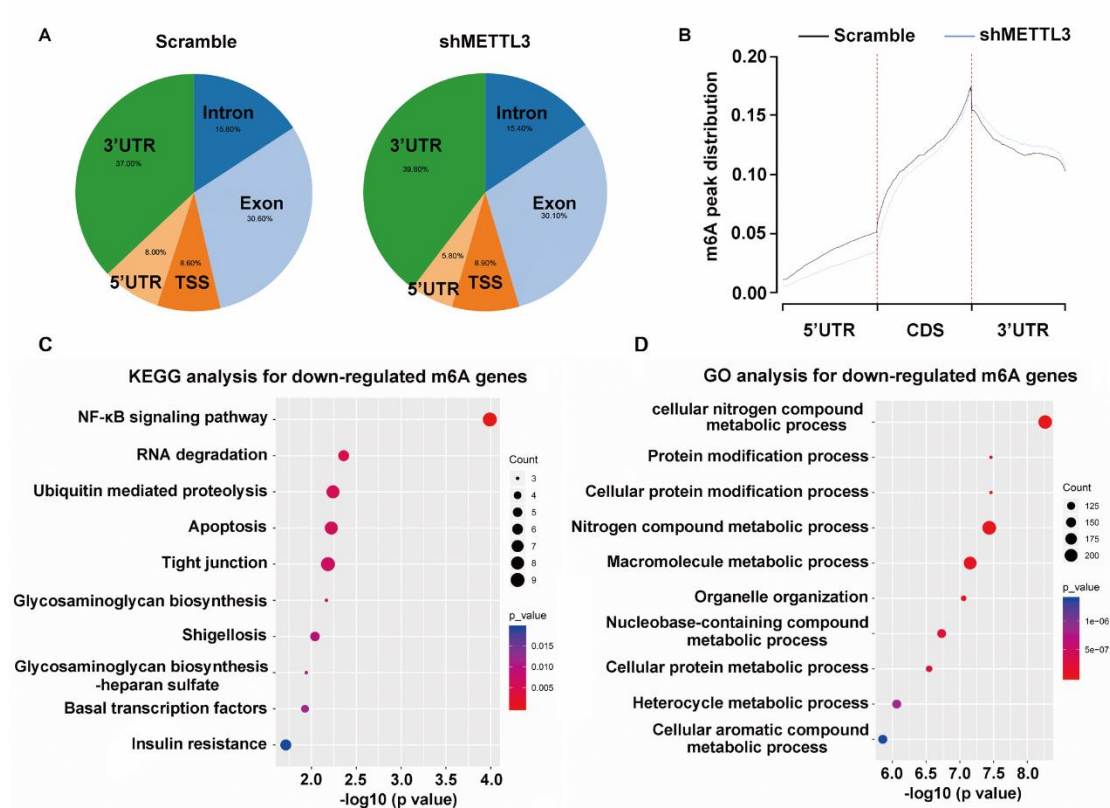

**Figure S5. Bioinformatics analyses for m<sup>6</sup>A-regulated genes in BCPAP cells.**

(A) Proportion of m<sup>6</sup>A peak distributions in the 5'UTR, TSS (transcriptional start site), exon, intron and 3'UTR region across the entire set of mRNA transcripts of control group and shMETTL3 group in BCPAP cells. (B) Density distribution of m<sup>6</sup>A peaks across 5'UTR, CDS and 3'UTR mRNA transcripts in METTL3-knockdown BCPAP cells related to the control cells. (C) and (D) KEGG enrichment analysis and GO biological process of the transcripts with decreased m<sup>6</sup>A methylation in BCPAP cells. Fold-change < -1.5 and adjusted *P* value < 0.05 were set as cutoff criteria.

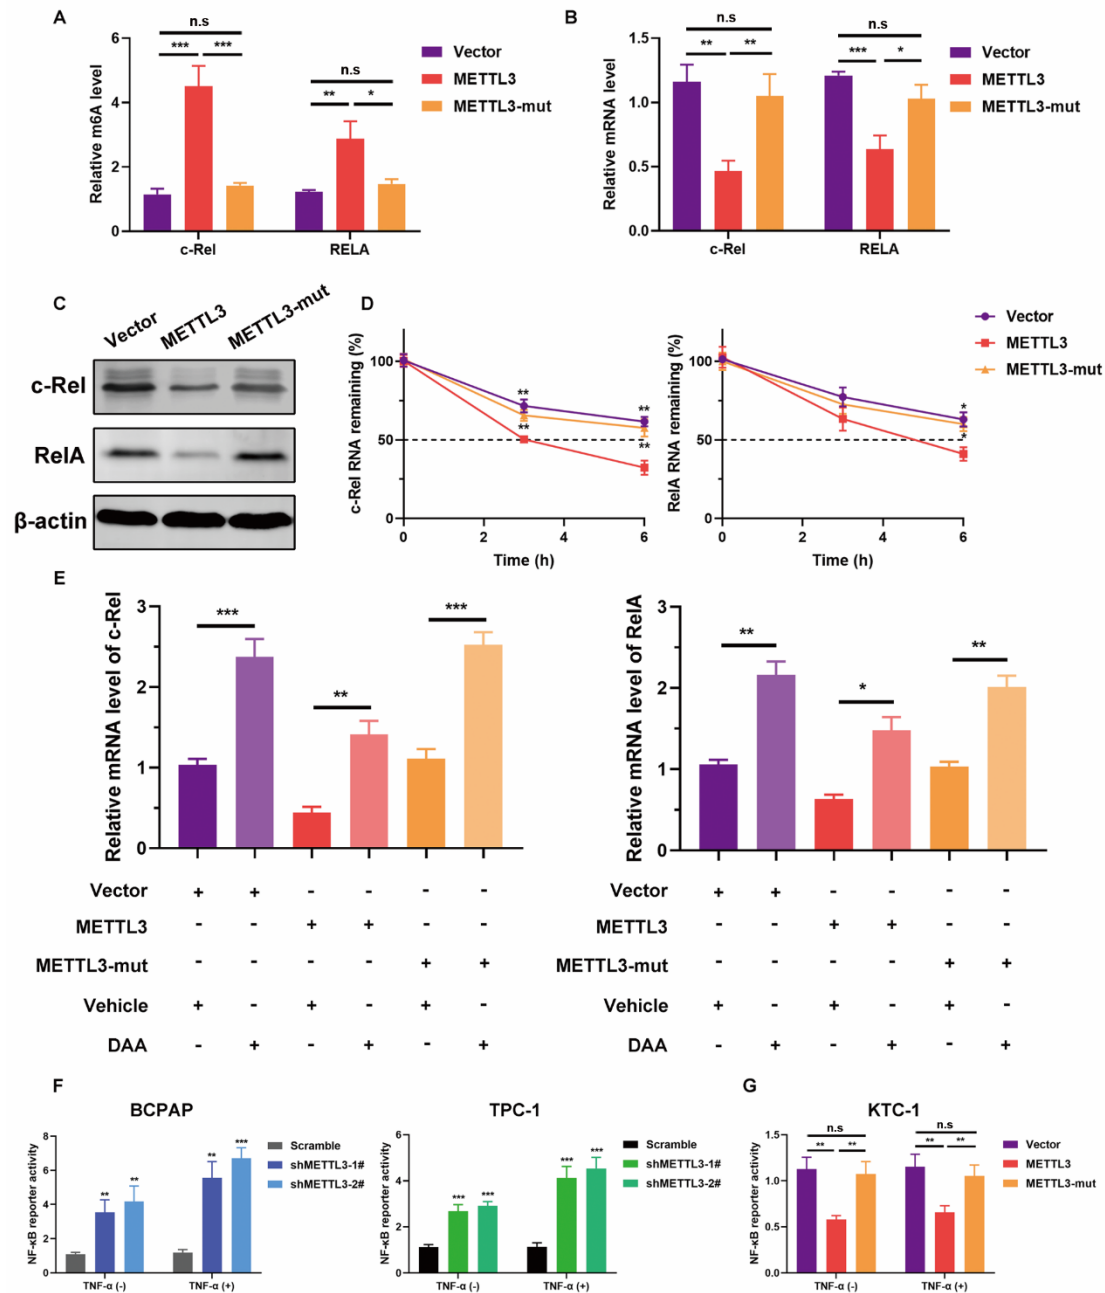

**Figure S6. METTL3 regulates c-Rel and RelA mRNA stability via an m<sup>6</sup>A-dependent manner.**

(A) and (B) Gene-specific m<sup>6</sup>A qPCR and RT-PCR analysis of alterations in the m<sup>6</sup>A level (A) and mRNA level (B) of c-Rel and RelA in wild type or mutant METTL3-overexpression and control KTC-1 cells. (C) Western blot analysis of c-Rel and RelA protein levels in stable wild-type METTL3, mutant-METTL3 and control KTC-1 cells. (D) c-Rel and RelA transcript were measured at indicated time points post actinomycin D treatment in KTC-1 cells. (E) RT-PCR analysis of expression levels of c-Rel (left panel) and RelA (right panel) in KTC-1 cells transfected with indicated plasmids in the presence or absence of global methylation inhibitor DAA for 24h. (F) and (G) The activity of NF- $\kappa$ B pathway was measured after the transfection with NF- $\kappa$ B reporter plasmid vectors and Renilla luciferase vector in indicated BCPAP, TPC-1 and KTC-1 in the presence or absence of TNF- $\alpha$  (10 ng/mL) for 24 h. (\* $P$  < 0.05, \*\* $P$  < 0.01, \*\*\* $P$  < 0.001, n.s: not significant)

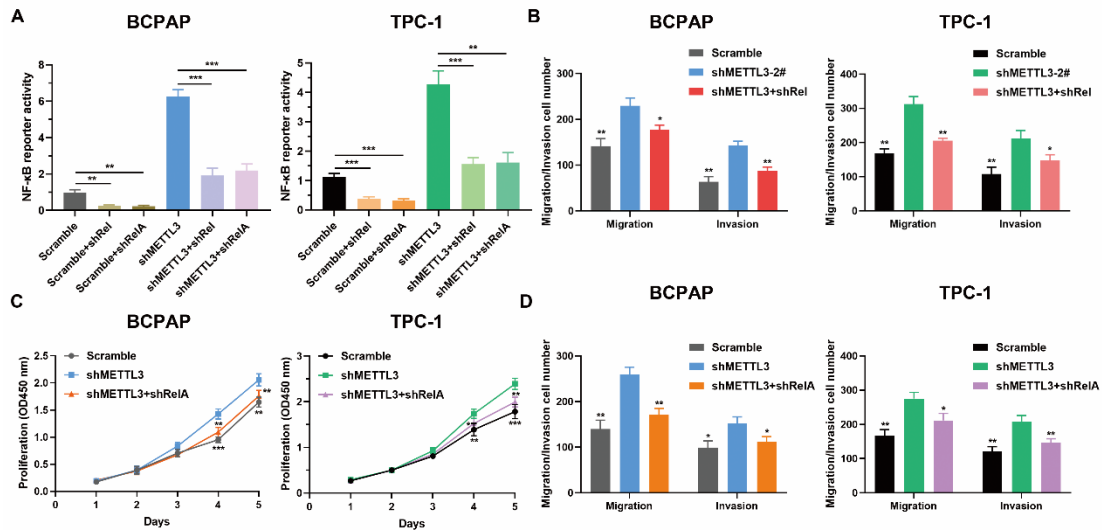

**Figure S7. Depletion of c-Rel or RelA impairs METTL3-mediated malignant phenotypes of PTC cells.**

(A) Relative NF-κB luciferase activity in the indicated cells with knockdown of c-Rel or RelA under the stimulation of TNF-α for 24 h. (B) Transwell migration and invasion assays were used to investigate the effects of inhibition of c-Rel on cells metastasis of METTL3-silencing BCPAP and TPC-1 cells. (C) CCK-8 assay showing that the knockdown of RelA partially rescued the proliferation inhibition of BCPAP and TPC-1 cells with the knockdown of METTL3. (D) Inhibition of RelA partially reversed the suppression of METTL3 knockdown on PTC cells migration and invasion. (\* $P < 0.05$ , \*\* $P < 0.01$ , \*\*\* $P < 0.001$ )



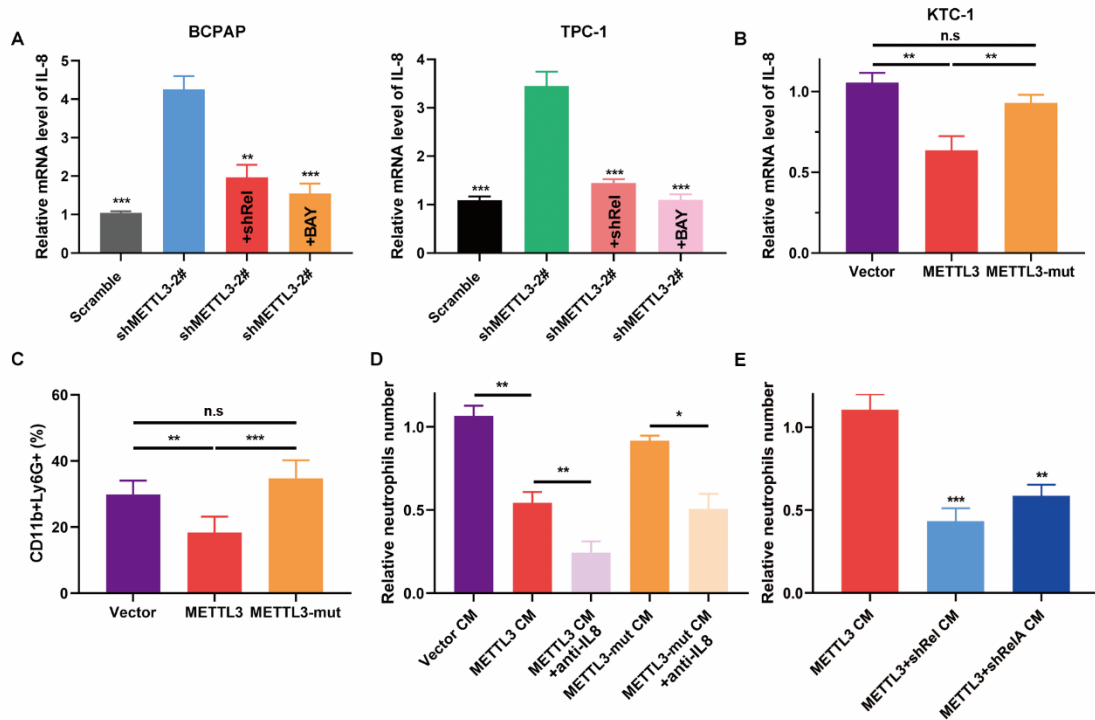

**Figure S8. METTL3 regulates TANs recruitment through IL-8.**

(A) IL-8 expression was inhibited in METTL3-silencing BCPAP and TPC-1 cells treated with BAY 11-7082 or knockdown of c-Rel compared to control cells. (B) Overexpression of METTL3 decreased the mRNA level of IL-8 in KTC-1 cells. (C) Flow cytometry showed inhibition of TANs (CD45<sup>+</sup>CD11b<sup>+</sup>Ly6G<sup>+</sup>) accumulation by METTL3 overexpression in KTC-1 subcutaneous tumor tissues (n=5 mice per group). (D) Chemotaxis assay results showed that overexpression of METTL3 combined with IL-8 neutralizing antibody impedes TANs recruitment. (E) The effects of c-Rel and RelA in METTL3-mediated neutrophils recruitment. (\* $P < 0.05$ , \*\* $P < 0.01$ , \*\*\* $P < 0.001$ , n.s: not significant)

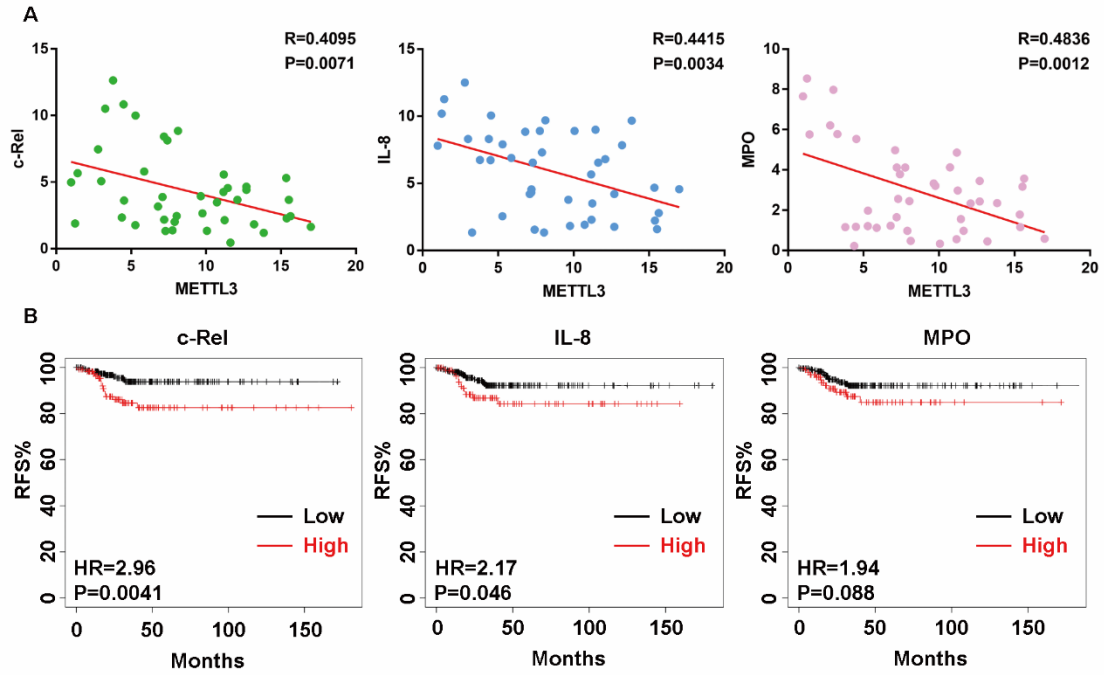

**Figure S9. Clinical correlation of METTL3 and its downstream targets in PTC tissues.**

(A) RT-PCR analysis of METLL3 expression and the level of c-Rel, IL-8 and MPO in PTC tissues and the corresponding correlations were presented. (B) Kaplan–Meier survival analysis of recurrent-free survival (RFS) in PTC patients with high and low level of c-Rel, IL-8 and MPO.

**Table S1.** The primers used in this study for RT-PCR analysis.

| <b>Genes</b>   | <b>Forward primer (5'-3')</b> | <b>Reverse primer (5'-3')</b> |
|----------------|-------------------------------|-------------------------------|
| METTL3         | AAGCTGCACTTCAGACGAAT          | GGAATCACCTCCGACACTC           |
| METTL14        | AGAAACTTGCAGGGCTTCCT          | TCTTCTTCATATGGCAAATTTTCTT     |
| WTAP           | GGCGAAGTGTCGAATGCT            | CCAACCTGCTGGCGTGTCT           |
| FTO            | TGGGTTTCATCCTACAACGG          | CCTCTTCAGGGCCTTCAC            |
| ALKBH5         | CCCGAGGGCTTCGTCAACA           | CGACACCCGAATAGGCTTGA          |
| c-Rel          | GCAGAGGGGAATGCGTTTTAG         | AGAAGGGTATGTTTCGGTTGTTG       |
| RelA           | CCCACGAGCTTGTAGGAAAGG         | GGATTCCCAGGTTCTGGAAAC         |
| IL-8           | ACTGAGAGTGATTGAGAGTGGAC       | AACCCTCTGCACCCAGTTTTC         |
| MPO            | CCAGATCATCACTTACCGGGA         | CACTGAGTCATTGTAGGAACGG        |
| $\beta$ -actin | GCACAGAGCCTCGCCTT             | CCTTGCACATGCCGGAG             |
